# Supplementary material for: Genetic SNUPN variants cause spinocerebellar atrophy by disrupting global splicing in Purkinje cells
Source: bioRxiv or medRxiv preprint supplement (doi:10.1101/2024.07.11.24310169), 2024-07-12
Supplement: Supplementary file [file media-1.pdf]

## Supplementary Information

### **Genetic *SNUPN* variants cause spinocerebellar atrophy by disrupting global splicing in Purkinje cells**

Mariko Okubo<sup>1)</sup>, Megumu Ogawa<sup>1)</sup>, Nobuyuki Eura<sup>1)</sup>, Yukiko U. Inoue<sup>2)</sup>, Ken-ichi Dewa<sup>3)</sup>, Tomohiro Owa<sup>2)</sup>, Satoshi Miyashita<sup>2)</sup>, Terumi Murakami<sup>4)</sup>, Hisayoshi Nakamura<sup>5)</sup>, Shinichiro Hayashi<sup>1)</sup>, Ikuya Nonaka<sup>1)</sup>, Katsuhisa Ogata<sup>4)</sup>, Mikio Hoshino<sup>2)</sup>, Takayoshi Inoue<sup>2)</sup>, Ichizo Nishino<sup>1), 5)</sup>, Satoru Noguchi<sup>1)</sup>

1) Department of Neuromuscular Research, National Institute of Neuroscience, National Center of Neurology and Psychiatry, Tokyo, Japan.

2) Department of Biochemistry and Cellular Biology, National Institute of Neuroscience, National Center of Neurology and Psychiatry, Tokyo, Japan.

3) Laboratory for Glia-Neuron Circuit Dynamics, RIKEN Center for Brain Science, Saitama, Japan  
Department of Neurology, NHO Higashisaitama Hospital, Saitama, Japan.

4) Medical Genome Center, National Institute of Neuroscience, National Center of Neurology and Psychiatry, Tokyo, Japan.

**Table S1. List of genes specifically expressed in PC**

| <b>Gene</b>          | <b>NCBI Accession</b> | <b>Gene</b>     | <b>NCBI Accession</b> |
|----------------------|-----------------------|-----------------|-----------------------|
| <i>4930567K20Rik</i> | NR_046010.1           | <i>Kalrn</i>    | XM_148399.5           |
| <i>4930587E11Rik</i> | NR_131017.1           | <i>Kcnab1</i>   | NM_010597.2           |
| <i>9530059O14Rik</i> | NR_015610.2           | <i>Kcnd3</i>    | NM_019931.1           |
| <i>9630028H03Rik</i> | NR_015544.2           | <i>Kcnh7</i>    | NM_133207.1           |
| <i>A330015K06Rik</i> | NR_126080.1           | <i>Kcnip1</i>   | NM_027398.2           |
| <i>Aars2</i>         | NM_198608.2           | <i>Kcnj10</i>   | NM_020269.3           |
| <i>Abat</i>          | NM_172961.2           | <i>Kcnma1</i>   | NM_010610.1           |
| <i>Abcd2</i>         | NM_011994.1           | <i>Kcnq2</i>    | NM_001003825.1        |
| <i>Abr</i>           | NM_198018.1           | <i>Khdrbs2</i>  | NM_133235.2           |
| <i>Adam23</i>        | NM_011780.1           | <i>Kife2</i>    | NM_010630.1           |
| <i>Adamts4</i>       | NM_172845.1           | <i>Kirrel2</i>  | NM_172898.1           |
| <i>Adcy1</i>         | mCT186681.0.0         | <i>Kiitl</i>    | NM_013598.1           |
| <i>Add3</i>          | NM_013758.2           | <i>Klc2</i>     | NM_008451.1           |
| <i>Adgrb3</i>        | NM_175642.4           | <i>Ksr2</i>     | NM_177751.2           |
| <i>Adrbk1 (Grk2)</i> | NM_130863.1           | <i>Large1</i>   | NM_001317391.1        |
| <i>Actr3</i>         | NM_023735.1           | <i>Lhfp13</i>   | XM_485569.1           |
| <i>Afap112</i>       | NM_146102.1           | <i>Lingo2</i>   | NM_175516.2           |
| <i>Aff1</i>          | 5830443C17.1          | <i>Lpcat4</i>   | NM_207206.1           |
| <i>Agbl4</i>         | XM_485427.1           | <i>Lrch1</i>    | XM_484393.1           |
| <i>Agmo</i>          | NM_178767.2           | <i>Lrfn5</i>    | NM_178714.2           |
| <i>Agtpbp1</i>       | NM_023328.1           | <i>Lrp5</i>     | NM_008513.1           |
| <i>Ahi1</i>          | NM_026203.1           | <i>Lrp8</i>     | NM_053073.1           |
| <i>Akap6</i>         | XM_484140.1           | <i>Lrrfip1</i>  | NM_008515.1           |
| <i>Aldh5a1</i>       | NM_172532.1           | <i>Lrrtm4</i>   | NM_178731.2           |
| <i>Ank2</i>          | NM_178655.2           | <i>Macrod2</i>  | XM_355346.2           |
| <i>Anks1b</i>        | XM_618798.1           | <i>Magi2</i>    | NM_015823.1           |
| <i>Ano10</i>         | NM_133979.1           | <i>Maoa</i>     | NM_173740.1           |
| <i>App</i>           | NM_007471.2           | <i>Map1a</i>    | XM_194040.4           |
| <i>Ar</i>            | NM_013476.2           | <i>Map1b</i>    | NM_008634.1           |
| <i>Arap2</i>         | XM_132099.6           | <i>Map2</i>     | NM_008632.1           |
| <i>Arhgap20</i>      | NM_175535.3           | <i>Mapk1</i>    | NM_011949.2           |
| <i>Arhgap26</i>      | NM_175164.2           | <i>Mapk8ip2</i> | NM_021921.2           |
| <i>Arhgap31</i>      | NM_020260.1           | <i>Mast4</i>    | XM_283179.3           |
| <i>Arhgap32</i>      | NM_177379.2           | <i>Mdga2</i>    | NM_207010.1           |
| <i>Arhgap5</i>       | NM_009706.1           | <i>Mdm4</i>     | NM_008575.2           |
| <i>Arhgef33</i>      | NM_001145452.1        | <i>Mef2c</i>    | NM_025282.1           |
| <i>Astn2</i>         | NM_019514.2           | <i>Meg3</i>     | NM_144513.1           |
| <i>Atg4d</i>         | NM_153583.8           | <i>Mettl16</i>  | NM_026197.1           |
| <i>Atl2</i>          | NM_019717.1           | <i>Mfsd11</i>   | NM_178620.2           |
| <i>Atm</i>           | NM_007499.1           | <i>Mthfr</i>    | NM_010840.2           |
| <i>Atp2a3</i>        | NM_016745.2           | <i>Mtpn</i>     | NM_008098.2           |
| <i>Atp2b2</i>        | NM_009723.1           | <i>Mtss1</i>    | NM_144800.1           |
| <i>Atrnl1</i>        | NM_181415.4           | <i>Muc3</i>     | XM_355711.2           |
| <i>Atxn1</i>         | NM_009124.2           | <i>Myo10</i>    | NM_019472.1           |
| <i>Atxn2</i>         | TC1461838.1           | <i>Napb</i>     | NM_019632.1           |
| <i>Auts2</i>         | NM_001363480.1        | <i>Nbea</i>     | TC1429975.1           |
| <i>Axin1</i>         | NM_009733.1           | <i>Ncam1</i>    | NM_010875.2           |
| <i>Bax</i>           | NM_007527.2           | <i>Ncoa1</i>    | NM_010881.1           |
| <i>Bcl11a</i>        | NM_016707.1           | <i>Ndnf</i>     | NM_172399.1           |
| <i>Bcl2</i>          | NM_009741.2           | <i>Ndrp4</i>    | NM_145602.1           |
| <i>Bdnf</i>          | NM_007540.3           | <i>Ndst1</i>    | NM_008306.2           |
| <i>Bzap1</i>         | NM_172449.1           | <i>Ndufa5</i>   | NM_026614.1           |
| <i>Cacna1a</i>       | NM_007578.1           | <i>Nell1</i>    | NM_177413.2           |
| <i>Cacna1b</i>       | NM_007579.1           | <i>Neurog1</i>  | NM_010896.2           |

|                        |                |                 |                |
|------------------------|----------------|-----------------|----------------|
| <i>Cacna1c</i>         | NM_009781.1    | <i>Neurog2</i>  | NM_009718.2    |
| <i>Cacna1d</i>         | NM_028981.1    | <i>Ngfr</i>     | NM_033217.1    |
| <i>Cacna1g</i>         | NM_009783.1    | <i>Nktr</i>     | NM_010918.1    |
| <i>Cacna1s</i>         | XM_358335.2    | <i>Nlgn1</i>    | NM_138666.2    |
| <i>Cacna2d2</i>        | NM_020263.2    | <i>Nlgn2</i>    | NM_198862.2    |
| <i>Cacnb4</i>          | TC1462712.1    | <i>Nmdar</i>    | NM_001372558.1 |
| <i>Calb1</i>           | TC1568100.1    | <i>Nova2</i>    | NM_001029877.3 |
| <i>Calb2</i>           | NM_007586.1    | <i>Nptxr</i>    | NM_028763.2    |
| <i>Camk2b</i>          | NM_007595.2    | <i>Nrcam</i>    | NM_176930.2    |
| <i>Camk2n2</i>         | NM_028420.2    | <i>Nrk</i>      | NM_013724.1    |
| <i>Camk4</i>           | NM_009793.1    | <i>Nrp2</i>     | NM_010939.1    |
| <i>Camta1</i>          | XM_355539.2    | <i>Nrxn3</i>    | NM_172544.1    |
| <i>Car8</i>            | NM_007592.1    | <i>Nsd1</i>     | NM_008739.1    |
| <i>Casc4</i>           | NM_177054.3    | <i>Ntrk2</i>    | NM_008745.1    |
| <i>Cask</i>            | NM_009806.1    | <i>Ntrk3</i>    | NM_008746.4    |
| <i>Ccdc64 (Bicdl1)</i> | XM_132372.3    | <i>Nup93</i>    | NM_172410.1    |
| <i>Ccdc85a</i>         | NM_181577.2    | <i>Nwd2</i>     | XM_132047.4    |
| <i>Ccdc88a</i>         | NM_176841.2    | <i>Olig2</i>    | NM_016967.1    |
| <i>Cck</i>             | NM_031161.1    | <i>Olig3</i>    | NM_053008.1    |
| <i>Cd38</i>            | NM_007646.2    | <i>Omp</i>      | NM_011010.2    |
| <i>Cdc42</i>           | NM_009861.1    | <i>Oxsr1</i>    | XM_135264.5    |
| <i>Cdh12</i>           | NM_001008420.1 | <i>P2rx4</i>    | NM_011026.1    |
| <i>Cdh18</i>           | XM_354862.2    | <i>Paxbp1</i>   | XM_358888.2    |
| <i>Cdk14</i>           | NM_011074.1    | <i>Pbrm1</i>    | NM_025847.1    |
| <i>Celf2</i>           | NM_010160.1    | <i>Pcdh19</i>   | XM_205287.3    |
| <i>Cend1</i>           | NM_021316.2    | <i>Pcp2</i>     | NM_008790.1    |
| <i>Cep126</i>          | NM_001045524.2 | <i>Pcp4</i>     | NM_008791.1    |
| <i>Chd5</i>            | XM_196334.4    | <i>Pcsk6</i>    | XM_355911.2    |
| <i>Chgb</i>            | NM_007694.1    | <i>Pde5a</i>    | NM_153422.1    |
| <i>Clmn</i>            | NM_053155.1    | <i>Pde9a</i>    | NM_008804.2    |
| <i>Clstn3</i>          | NM_153508.2    | <i>Per1</i>     | NM_011065.2    |
| <i>Cntnap1</i>         | NM_016782.1    | <i>Phactr2</i>  | XM_125520.5    |
| <i>Cntn1</i>           | NM_007727.1    | <i>Pkp4</i>     | NM_026361.1    |
| <i>Cntn3</i>           | NM_008779.1    | <i>Plcb1</i>    | NM_019677.1    |
| <i>Cntn5</i>           | XM_146640.5    | <i>Plcb4</i>    | NM_013829.1    |
| <i>Cntnap2</i>         | NM_001004357.0 | <i>Plcx2</i>    | XM_484546.1    |
| <i>Cntnap5a</i>        | NM_001371013.1 | <i>Plekhdl1</i> | XM_126991.4    |
| <i>Cntnap5b</i>        | NM_172851.1    | <i>Pmpca</i>    | NM_173180.2    |
| <i>Cntnap5c</i>        | NM_001081653.2 | <i>Poldip3</i>  | NM_178627.1    |
| <i>Col18a1</i>         | NM_009929.2    | <i>Polrmt</i>   | NM_172551.1    |
| <i>Corin</i>           | NM_016869.1    | <i>Ppp1r16b</i> | NM_153089.2    |
| <i>Cpeb1</i>           | NM_007755.1    | <i>Ppp1r17</i>  | NM_011153.2    |
| <i>Cpne1</i>           | NM_170590.1    | <i>Ppp1r1b</i>  | NM_144828.1    |
| <i>Cpne9</i>           | NM_170673.3    | <i>Ppp4r4</i>   | NM_028980.1    |
| <i>Cpsfl</i>           | NM_053193.1    | <i>Prex1</i>    | XM_485102.1    |
| <i>Crhr1</i>           | NM_007762.2    | <i>Prex2</i>    | XM_129358.3    |
| <i>Csdc2</i>           | NM_145473.1    | <i>Prkcg</i>    | NM_011102.2    |
| <i>Csde1</i>           | NM_144901.2    | <i>Prkg1</i>    | NM_011160.1    |
| <i>Cttmbp2</i>         | XM_289703.3    | <i>Prpf38b</i>  | NM_025845.1    |
| <i>Ctxn2</i>           | C630031J20.1   | <i>Ptbp1</i>    | NM_008956.1    |
| <i>Cwf19l1</i>         | XM_129328.5    | <i>Ptchd4</i>   | XM_140020.3    |
| <i>Dab1</i>            | NM_010014.1    | <i>Pten</i>     | NM_008960.2    |
| <i>Dach1</i>           | NM_007826.1    | <i>Ptfla</i>    | NM_018809.1    |
| <i>Ddx26b</i>          | NM_172779.1    | <i>Ptprm</i>    | NM_008984.1    |
| <i>Ddx55</i>           | NM_026409.4    | <i>Ptprz1</i>   | XM_358362.2    |
| <i>Dgkb</i>            | NM_178681.2    | <i>Pura</i>     | NM_008989.4    |

|                 |                   |                        |                |
|-----------------|-------------------|------------------------|----------------|
| <i>Dgkg</i>     | NM_138650.1       | <i>Pvalb</i>           | NM_013645.2    |
| <i>Dgkh</i>     | XM_484397.1       | <i>Rabggtb</i>         | NM_011231.1    |
| <i>Dgki</i>     | XM_355752.2       | <i>Rasal2</i>          | XM_355247.3    |
| <i>Dgkz</i>     | NM_138306.1       | <i>Rb1</i>             | NM_009029.1    |
| <i>Disp2</i>    | NM_170593.1       | <i>Rbfox1</i>          | NM_021477.2    |
| <i>Dkk3</i>     | NM_015814.2       | <i>Rbfox2</i>          | NM_053104.3    |
| <i>Dlg2</i>     | NM_011807.1       | <i>Rbms1</i>           | NM_020296.1    |
| <i>Dmd</i>      | NM_007868.1       | <i>Rbms3</i>           | NM_178660.2    |
| <i>Dmxl2</i>    | XM_358382.2       | <i>Rel12</i>           | NM_153793.2    |
| <i>Dner</i>     | NM_152915.1       | <i>Reln</i>            | NM_011261.1    |
| <i>Dpp10</i>    | NM_199021.2       | <i>Rgs7bp</i>          | NM_029879.1    |
| <i>Dscam</i>    | NM_031174.2       | <i>Rgs8</i>            | NM_026380.2    |
| <i>Ebf1</i>     | NM_007897.1       | <i>Rictor</i>          | NM_030168.2    |
| <i>Ebf2</i>     | NM_010095.2       | <i>Rims2</i>           | NM_053271.1    |
| <i>Efr3a</i>    | NM_133766.1       | <i>Robo2</i>           | NM_175549.2    |
| <i>Egfm1</i>    | XM_130829.4       | <i>Rora</i>            | NM_013646.1    |
| <i>Elmo1</i>    | NM_080288.1       | <i>Rreb1</i>           | XM_127279.5    |
| <i>Emd</i>      | NM_007927.1       | <i>Ryr1</i>            | NM_009109.1    |
| <i>Eml6</i>     | NM_146016.1       | <i>Sacs</i>            | NM_172809.1    |
| <i>Enho</i>     | NM_027147.1       | <i>Sam68 (Khdrbs1)</i> | NM_011317.2    |
| <i>Epb4.113</i> | NM_013813.1       | <i>Scg3</i>            | NM_009130.1    |
| <i>Epha4</i>    | NM_007936.2       | <i>Scn1a</i>           | XM_619757.1    |
| <i>Epha5</i>    | NM_007937.1       | <i>Scn1b</i>           | NM_011322.2    |
| <i>Epha6</i>    | NM_007938.1       | <i>Scn8a</i>           | NM_011323.1    |
| <i>Erc2</i>     | NM_177814.3       | <i>Sema3a</i>          | NM_009152.2    |
| <i>Ercc6l</i>   | NM_146235.2       | <i>Setx</i>            | NM_198033.1    |
| <i>Etl4</i>     | TC1571230.1       | <i>Sez6l2</i>          | NM_144926.2    |
| <i>Exosc8</i>   | NM_027148.2       | <i>Sf3a1</i>           | NM_026175.3    |
| <i>Fam107b</i>  | NM_025626.3       | <i>Sf3b1</i>           | NM_031179.1    |
| <i>Fam149b</i>  | NM_172379.1       | <i>Sgcz</i>            | NM_145841.1    |
| <i>Fam184b</i>  | NM_021416.2       | <i>Shank1</i>          | NM_001034115.1 |
| <i>Far2</i>     | NM_178797.2       | <i>Shank2</i>          | XM_146170.3    |
| <i>Fbxo33</i>   | XM_127032.3       | <i>Shh</i>             | NM_009170.2    |
| <i>Fcor</i>     | XM_358687.2       | <i>Shisa6</i>          | XM_354612.2    |
| <i>Fmr1</i>     | NM_008031.2       | <i>Slc12a5</i>         | NM_020333.1    |
| <i>Foxp1</i>    | NM_053202.1       | <i>Slc17a8</i>         | NM_182959.2    |
| <i>Foxp2</i>    | NM_053242.3       | <i>Slc1a3</i>          | NM_148938.2    |
| <i>Foxp4</i>    | NM_028767.1       | <i>Slc1a6</i>          | NM_009200.1    |
| <i>Frmd4a</i>   | NM_172475.2       | <i>Slc35f1</i>         | NM_178675.3    |
| <i>Frmd5</i>    | NM_172673.2       | <i>Slc4a10</i>         | NM_033552.1    |
| <i>Frmpd3</i>   | NM_177750.2       | <i>Slc6a8</i>          | NM_133987.1    |
| <i>Frmpd4</i>   | XM_285569.3       | <i>Slc9a1</i>          | NM_016981.1    |
| <i>Fsd1</i>     | NM_183178.1       | <i>Slc9a3</i>          | XM_127434.4    |
| <i>Fubp1</i>    | NM_057172.1       | <i>Slc9a6</i>          | NM_172780.1    |
| <i>Fxyd7</i>    | NM_022007.1       | <i>Snap25</i>          | NM_011428.2    |
| <i>Gabra1</i>   | NM_010250.2       | <i>Sncb</i>            | NM_033610.2    |
| <i>Gabrb2</i>   | NM_172432.1       | <i>Snhg11</i>          | NM_175692.2    |
| <i>Gabrb3</i>   | NM_008071.2       | <i>Sntg1</i>           | NM_027671.3    |
| <i>Gabrg2</i>   | NM_008073.1       | <i>Snx14</i>           | NM_172926.1    |
| <i>Galnt13</i>  | NM_173030.1       | <i>Sos1</i>            | NM_009231.1    |
| <i>Garnl3</i>   | NM_178888.3       | <i>Sox5</i>            | NM_011444.1    |
| <i>Gdnf</i>     | NM_010275.1       | <i>Spock3</i>          | NM_023689.2    |
| <i>Gfod1</i>    | XM_488675.1       | <i>Sptan1</i>          | XM_207079.3    |
| <i>Gfra1</i>    | NM_010279.2       | <i>Sptbn2</i>          | NM_021287.2    |
| <i>Gm14033</i>  | NSMUST00000128307 | <i>Srgap1</i>          | XM_125904.3    |
| <i>Gm15336</i>  | NSMUST00000128894 | <i>Stac</i>            | NM_016853.1    |

|                |                    |                |                |
|----------------|--------------------|----------------|----------------|
| <i>Gm26713</i> | NSMUST00000181827. | <i>Stam</i>    | NM_011484.2    |
| <i>Gm32647</i> | NSMUST00000206116. | <i>Stat3</i>   | NM_011486.3    |
| <i>Gm35188</i> | NSMUST00000218869  | <i>Stk39</i>   | NM_016866.2    |
| <i>Gm42439</i> | NSMUST00000195931  | <i>Stmn3</i>   | NM_009133.2    |
| <i>Gm44040</i> | NSMUST00000203360  | <i>Strn3</i>   | NM_052973.1    |
| <i>Gm44071</i> | NSMUST00000204180  | <i>Stx3</i>    | NM_011502.1    |
| <i>Gng13</i>   | NM_022422.3        | <i>Sugp2</i>   | NM_172755.2    |
| <i>Gng4</i>    | NM_010317.2        | <i>Svil</i>    | NM_153153.1    |
| <i>Gnptab</i>  | NM_001004164.1     | <i>Sycp1</i>   | NM_011516.1    |
| <i>Gpc6</i>    | NM_011821.1        | <i>Syn1</i>    | NM_013680.1    |
| <i>Gria2</i>   | NM_013540.1        | <i>Syndig1</i> | XM_485077.1    |
| <i>Gria3</i>   | NM_016886.1        | <i>Syt14</i>   | NM_181546.2    |
| <i>Gria4</i>   | NM_019691.2        | <i>Tbl1xr1</i> | NM_030732.3    |
| <i>Grid2</i>   | NM_008167.1        | <i>Tbp</i>     | NM_013684.1    |
| <i>Grid2ip</i> | NM_001159321.2     | <i>Tbpl1</i>   | NM_011603.2    |
| <i>Grik1</i>   | NM_146072.1        | <i>Tenn2</i>   | NM_011856.2    |
| <i>Grin1</i>   | NM_008169.1        | <i>Tenn3</i>   | NM_011857.2    |
| <i>Grip1</i>   | NM_028736.1        | <i>Tenn4</i>   | NM_011858.1    |
| <i>Grm1</i>    | NM_016976.1        | <i>Thsd7a</i>  | XM_287555.3    |
| <i>Grm5</i>    | XM_149971.4        | <i>Thy1</i>    | NM_009382.2    |
| <i>Grm7</i>    | XM_144986.3        | <i>Tpp1</i>    | NM_009906.2    |
| <i>Gstm1</i>   | NM_010358.2        | <i>Trabd2b</i> | NM_001085549.1 |
| <i>Hdac9</i>   | NM_024124.2        | <i>Traf6</i>   | NM_009424.2    |
| <i>Heatr5a</i> | NM_177171.3        | <i>Trim32</i>  | NM_053084.1    |
| <i>Hepacam</i> | NM_175189.2        | <i>Trim9</i>   | NM_053167.1    |
| <i>Homer3</i>  | NM_011984.1        | <i>Trpc3</i>   | NM_019510.1    |
| <i>Hpcal1</i>  | NM_016677.1        | <i>Ttll5</i>   | XM_126935.5    |
| <i>Hsd11b1</i> | NM_008288.1        | <i>Ube3a</i>   | NM_011668.1    |
| <i>Hspa12a</i> | NM_175199.1        | <i>Ube3b</i>   | NM_054093.1    |
| <i>Hspa14</i>  | NM_015765.1        | <i>Unc5b</i>   | NM_029770.1    |
| <i>Htr1b</i>   | NM_010482.1        | <i>Unc5d</i>   | NM_153135.1    |
| <i>Htt</i>     | NM_010414.1        | <i>Upf1</i>    | NM_030680.1    |
| <i>Huwel</i>   | XM_136108.4        | <i>Vav3</i>    | NM_020505.1    |
| <i>Iltifb</i>  | NM_054079.2        | <i>Vps13d</i>  | XM_204062.4    |
| <i>Immp2l</i>  | NM_053122.2        | <i>Vstm2l</i>  | NM_198627.2    |
| <i>Inpp1</i>   | NM_008384.1        | <i>Washc2</i>  | NM_026585.3    |
| <i>Inpp4a</i>  | NM_030266.1        | <i>Wnt3</i>    | NM_009521.1    |
| <i>Inpp5a</i>  | NM_183144.1        | <i>Wwox</i>    | NM_019573.2    |
| <i>IREB2</i>   | XM_134910.4        | <i>Zdhhc14</i> | NM_146073.3    |
| <i>Itgb3</i>   | NM_016780.1        | <i>Zfand4</i>  | XM_132758.5    |
| <i>Itpka</i>   | NM_146125.1        | <i>Zfp385c</i> | NM_177790.2    |
| <i>Itpr1</i>   | NM_010585.5        |                |                |

**Table S2. Genes with splicing abnormalities in PC by MISO analysis**

| Gene            | NCBI Accession (cerereunum) | Splicing pattern | delta Ψ | Event location                                                                                      |
|-----------------|-----------------------------|------------------|---------|-----------------------------------------------------------------------------------------------------|
| <i>Abat</i>     | NM_172961.3                 | SE               | -0.06   | chr16:8608856:8608893;chr16:8611127:8611294;chr16:8613983:8614129                                   |
| <i>Abat</i>     | NM_172961.3                 | A5SS             | 0.2     | chr16:8582737:8582782 8582854;chr16:8588886:8588935                                                 |
| <i>Adam23</i>   | NM_011780.3                 | SE               | -0.07   | chr1:63572887:63572998;chr1:63585365:63585455;chr1:63592608:63596515                                |
| <i>Adcy1</i>    |                             | SE               | 0.09    | chr11:7165412:7165526;chr11:7166240:7166289;chr11:7167064:7167188                                   |
| <i>Add3</i>     | NM_013758.4                 | SE               | 0.08    | chr19:53242504:53242627;chr19:53244310:53244405;chr19:53244998:53247399                             |
| <i>Adrbk1</i>   | NM_130863.2                 | RI               | -0.06   | chr19:42916414291590;chr19:42913304291239                                                           |
| <i>Agtpbp1</i>  | NM_023328.3                 | MXE              | 0.08    | chr13:59532013:59532076;chr13:59531057:59531203;chr13:59528387:59528518;chr13:59525146:59525239     |
| <i>Agtpbp1</i>  | NM_023328.3                 | A5SS             | 0.06    | chr13:59557286:59557098 59557223;chr13:59544387:59544451                                            |
| <i>Anks1b</i>   |                             | SE               | 0.05    | chr10:90897247:90897426;chr10:90914696:90914767;chr10:90921296:90921424                             |
| <i>Anks1b</i>   |                             | A3SS             | -0.37   | chr10:90897247:90897426;chr10:90914693 90914696:90914767                                            |
| <i>Arhgap26</i> | NM_175164.4                 | RI               | -0.11   | chr18:3935755339357663;chr18:3935779939357828                                                       |
| <i>Arhgap26</i> | NM_175164.4                 | A5SS             | 0.05    | chr18:39357553:39357663 39357828;chr18:39363117:39363208                                            |
| <i>Asn2</i>     | NM_019514.3                 | A3SS             | 0.1     | chr4:65912561:65912635;chr4:65911785 65911797:65911660                                              |
| <i>Atm</i>      | NM_007499.2                 | A5SS             | -0.06   | chr9:53451689:53451549 53451660;chr9:53450518:53450634                                              |
| <i>Atp2a3</i>   | NM_016745.3                 | SE               | 0.13    | chr11:72988970:72989087;chr11:72989475:72989547;chr11:72991689:72993043                             |
| <i>Atp2a3</i>   | NM_016745.3                 | SE               | 0.09    | chr11:72988970:72989087;chr11:72989475:72989560;chr11:72991689:72993043                             |
| <i>Atp2a3</i>   | NM_016745.3                 | A3SS             | -0.06   | chr11:72980127:72980345;chr11:72980439 72980493:72980774                                            |
| <i>Atxn2</i>    |                             | SE               | -0.07   | chr5:121802948:121803080;chr5:121806222 121806275;chr5:121810851:121810996                          |
| <i>Aut2</i>     |                             | MXE              | 0.09    | chr5:131445399:131445482;chr5:131443756:131443805;chr5:131443456:131443678;chr5:131437682:131440693 |
| <i>Aut2</i>     |                             | A5SS             | -0.11   | chr5:131472479:131472238 131472259;chr5:131470414:131470458                                         |
| <i>Bzap1</i>    | NM_172449.2                 | SE               | -0.13   | chr11:87781945:87782049;chr11:87782660:87782710;chr11:87784736:87785928                             |
| <i>Bzap1</i>    | NM_172449.2                 | RI               | 0.06    | chr11:8778168287781753;chr11:8778194587782049                                                       |
| <i>Bzap1</i>    | NM_172449.2                 | A5SS             | 0.05    | chr11:87781302:87781334 87781370;chr11:87781490:87781593                                            |
| <i>Cacna1a</i>  | NM_007578.3                 | MXE              | 0.14    | chr8:84612285:84612412;chr8:84614695:84614791;chr8:84615574:84615670;chr8:84617792:84617897         |
| <i>Cacna1b</i>  | NM_007579.3                 | A3SS             | -0.14   | chr2:24685768:24685874;chr2:24679640 24679643:24678876                                              |
| <i>Cacna1c</i>  |                             | MXE              | 0.2     | chr6:118675820:118675949;chr6:118674555:118674614;chr6:118674346:118674405;chr6:118670350:118670456 |
| <i>Cacna1c</i>  |                             | A5SS             | -0.11   | chr6:118630431:118630225 118630399;chr6:118627442:118627570                                         |
| <i>Cacna1d</i>  |                             | MXE              | 0.25    | chr14:30095318:30095428;chr14:30089822:30089905;chr14:30089296:30089379;chr14:30082952:30082996     |
| <i>Cacna1d</i>  | NM_028981.3                 | A3SS             | 0.1     | chr14:30130117:30130204;chr14:30128798 30129848:30128772                                            |
| <i>Cacna1d</i>  | NM_009783.3                 | A5SS             | 0.21    | chr11:94425977:94425764 94425785;chr11:94418819:94418970                                            |
| <i>Cacna1g</i>  | NM_009783.3                 | A5SS             | 0.11    | chr11:94425977:94425764 94425785;chr11:94423671:94423724                                            |
| <i>Cacna1g</i>  | NM_009783.3                 | A3SS             | 0.05    | chr11:94416841:94416911;chr11:94416655 94416704:94416626                                            |
| <i>Camk2b</i>   | NM_007595.5                 | SE               | -0.06   | chr11:5979673:5979721;chr11:5976765:5976893;chr11:5972813:5972888                                   |
| <i>Camk2b</i>   | NM_007595.5                 | SE               | 0.32    | chr11:5988101:5988143;chr11:5987057:5987131;chr11:5982721:5982758                                   |
| <i>Camk2b</i>   | NM_007595.5                 | RI               | 0.09    | chr11:59728885972813;chr11:5972765972632                                                            |
| <i>Cask</i>     | NM_009806.3                 | A5SS             | -0.12   | chrX:13786049:13785919 13785937;chrX:13714666:13714771                                              |
| <i>Cask</i>     | NM_009806.3                 | A3SS             | -0.21   | chrX:13544514:13544629;chrX:13537826 13537841:13537761                                              |
| <i>Ccdc64</i>   |                             | A5SS             | -0.16   | chr5:115652986:115652627 115652925;chr5:115651819:115651939                                         |
| <i>Cdh18</i>    |                             | A3SS             | 0.14    | chr15:23445978:23446095;chr15:23460316 23460425:23460567                                            |
| <i>Chd5</i>     |                             | SE               | -0.19   | chr4:152385433:152385596;chr4:152385724:152385838;chr4:152385949:152386002                          |
| <i>Chd5</i>     |                             | A3SS             | -0.13   | chr4:152384485:152384680;chr4:152385433 152385534:152385596                                         |
| <i>Cntnap5b</i> | NM_172851.2                 | SE               | -0.26   | chr1:100369757:100369884;chr1:100370058:100370228;chr1:100379051:100379269                          |
| <i>Cpeb1</i>    | NM_007755.5                 | A5SS             | 0.13    | chr7:81356998:81356894 81356909;chr7:81355875:81356011                                              |
| <i>Cpeb1</i>    | NM_007755.5                 | A3SS             | -0.06   | chr7:81436203:81436377;chr7:81372200 81372203:81372012                                              |
| <i>Cpne9</i>    | NM_170673.3                 | SE               | 0.13    | chr6:113283047:113283087;chr6:113283196:113283242;chr6:113283350:113283453                          |
| <i>Cpne9</i>    | NM_170673.3                 | RI               | 0.12    | chr6:1132925221 13293064;chr6:1132937091 13293755                                                   |
| <i>Cpne9</i>    | NM_170673.3                 | RI               | 0.21    | chr6:1132925221 13292575;chr6:1132930031 13293064                                                   |
| <i>Crhr1</i>    | NM_007762.5                 | SE               | -0.21   | chr11:104173306:104173391;chr11:104173595:104173730;chr11:104173889:104173930                       |
| <i>Crhr1</i>    | NM_007762.5                 | SE               | -0.13   | chr11:104153521:104153608;chr11:104163804:104163889;chr11:104169056:104169162                       |
| <i>Crhr1</i>    | NM_007762.5                 | SE               | 0.06    | chr11:104153521:104153608;chr11:104159252:104159371;chr11:104163804:104163889                       |
| <i>Cttnbp2</i>  |                             | A5SS             | 0.13    | chr6:18435446:18433820 18433983;chr6:18427439:18427642                                              |
| <i>Cwf191l</i>  |                             | A3SS             | -0.15   | chr19:44133000:44133084;chr19:44132148 44132164:44132086                                            |
| <i>Dab1</i>     | NM_010014.3                 | RI               | 0.13    | chr4:104680070104680108;chr4:104680191 104680382                                                    |
| <i>Ddx26b</i>   | NM_172779.4                 | SE               | -0.13   | chrX:56493039:56493133;chrX:56494133:56494243;chrX:56496516:56496734                                |
| <i>Ddx26b</i>   | NM_172779.4                 | RI               | -0.11   | chrX:5649303956493133;chrX:5649651656496734                                                         |
| <i>Ddx26b</i>   | NM_172779.4                 | A5SS             | 0.12    | chrX:56506880:56506999 56507062;chrX:56507214:56507843                                              |
| <i>Dgkb</i>     | NM_178681.4                 | SE               | 0.54    | chr12:38084167:38084243;chr12:38087573:38087593;chr12:38100364:38100517                             |
| <i>Dgkh</i>     |                             | A5SS             | -0.17   | chr14:78604550:78604277 78604303;chr14:78603026:78603133                                            |
| <i>Dgkh</i>     |                             | A3SS             | -0.09   | chr14:78577449:78577557;chr14:78576012 78576017:78575887                                            |
| <i>Dgkz</i>     | NM_138306.2                 | RI               | 0.06    | chr2:9193408991934056;chr2:9193384291933743                                                         |
| <i>Dgkz</i>     | NM_138306.2                 | A3SS             | -0.51   | chr2:91936858:91936937;chr2:91936771 91936774:91936702                                              |
| <i>Dgkz</i>     | NM_138306.2                 | A3SS             | -0.07   | chr2:91944022:91944099;chr2:91942684 91942814:91942628                                              |
| <i>Dlg2</i>     |                             | SE               | -0.06   | chr7:92417224:92417323;chr7:92420632:92420673;chr7:92427691:92427741                                |
| <i>Dlg2</i>     |                             | MXE              | -0.16   | chr7:92386915:92386990;chr7:92417224:92417323;chr7:92418088:92418133;chr7:92420632:92420673         |
| <i>Dmnl2</i>    |                             | A3SS             | -0.37   | chr9:54398047:54398123;chr9:54396367 54396370:54396240                                              |
| <i>Ebf1</i>     | NM_007897.3                 | A5SS             | -0.18   | chr11:44621167:44621230 44621349;chr11:44621921:44621976                                            |
| <i>Ebf1</i>     | NM_007897.3                 | A3SS             | 0.14    | chr11:44883814:44883931;chr11:44907904 44907907:44908037                                            |
| <i>Ebf2</i>     | NM_010095.6                 | A3SS             | -0.4    | chr14:67233292:67233956;chr14:67234826 67234831:67235265                                            |
| <i>Efr3a</i>    |                             | SE               | 0.19    | chr15:65787041:65787246;chr15:65788302:65788381;chr15:65790140:65791351                             |
| <i>Egfm1</i>    |                             | SE               | -0.16   | chr3:29657130:29657267;chr3:29662377:29662499;chr3:29668241:29668438                                |
| <i>Egfm1</i>    |                             | MXE              | -0.1    | chr3:29153497:29153601;chr3:29357145:29357195;chr3:29513888:29514010;chr3:29582907:29583029         |
| <i>Emd</i>      | NM_007927.3                 | SE               | 0.08    | chrX:74255743:74255876;chrX:74256878:74256924;chrX:74260782:74261548                                |

|                |                |      |       |                                                                                                      |
|----------------|----------------|------|-------|------------------------------------------------------------------------------------------------------|
| <i>Eml6</i>    | NM_146016.2    | A3SS | 0.3   | chr11:29821639:29821757:chr11:29819092:29819184:29818906:                                            |
| <i>Epha5</i>   | NM_007937.3    | A3SS | -0.22 | chr5:84150342:84150501:chr5:84142380:84142383:84142278:                                              |
| <i>Epha5</i>   | NM_007937.3    | A3SS | 0.09  | chr5:84331228:84331891:chr5:84237554:84237556:84237399:                                              |
| <i>Erc2</i>    | NM_177814.4    | SE   | 0.23  | chr14:28302876:28303010:chr14:28317249:28317314:chr14:28475603:28478537:                             |
| <i>Erc2</i>    | NM_177814.4    | SE   | -0.18 | chr14:27652687:27653483:chr14:27776159:27776182:chr14:27776826:27777242:                             |
| <i>Erc2</i>    | NM_177814.4    | SE   | 0.09  | chr14:28025033:28025173:chr14:28029434:28029469:chr14:28040343:28040536:                             |
| <i>Erc2</i>    | NM_177814.4    | SE   | 0.05  | chr14:27622442:27622614:chr14:27623683:27623749:chr14:27652687:27653483:                             |
| <i>Etl4</i>    |                | SE   | -0.14 | chr2:20801542:20801661:chr2:20805585:20805662:chr2:20807902:20808024:                                |
| <i>Etl4</i>    |                | SE   | 0.24  | chr2:20289894:20290041:chr2:20339922:20340109:chr2:20529959:20530242:                                |
| <i>Etl4</i>    |                | SE   | 0.14  | chr2:20798616:20798783:chr2:20801542:20801661:chr2:20807902:20808024:                                |
| <i>Etl4</i>    |                | SE   | -0.12 | chr2:20805585:20805662:chr2:20805775:20807373:chr2:20807902:20808024:                                |
| <i>Etl4</i>    |                | SE   | 0.15  | chr2:20743459:20744291:chr2:20759547:20759651:chr2:20760215:20760264:                                |
| <i>Exosc8</i>  | NM_027148.3    | RI   | 0.28  | chr3:5473433254734296:chr3:5473416654734103:                                                         |
| <i>Fam149b</i> | NM_172379.3    | SE   | 0.15  | chr14:20356355:20356497:chr14:20358024:20358140:chr14:20363263:20363450:                             |
| <i>Fam149b</i> | NM_172379.3    | SE   | 0.08  | chr14:20375510:20375613:chr14:20377775:20377999:chr14:20378400:20378523:                             |
| <i>Fmr1</i>    | NM_008013.3    | A3SS | 0.07  | chrX:68710584:68710779:chrX:68712231 68712306:68712413:                                              |
| <i>Foxp1</i>   | NM_053202.2    | A3SS | -0.13 | chr6:98945534:98945735:chr6:98945423:98945426:98945347:                                              |
| <i>Foxp1</i>   | NM_053202.2    | A3SS | -0.08 | chr6:99016528:99016665:chr6:99015510:99015513:99015424:                                              |
| <i>Foxp2</i>   | NM_053242.4    | SE   | -0.15 | chr6:14901349:14901761:chr6:14988323:14988464:chr6:15084482:15084575:                                |
| <i>Foxp2</i>   | NM_053242.4    | SE   | -0.08 | chr6:15405559:15405642:chr6:15409741:15409942:chr6:15411026:15411102:                                |
| <i>Foxp2</i>   | NM_053242.4    | A5SS | 0.12  | chr6:15084482:15084575 15084578:chr6:15196951:15197128:                                              |
| <i>Foxp2</i>   | NM_053242.4    | A3SS | 0.1   | chr6:15377681:15377730:chr6:15377870 15377888:15378088:                                              |
| <i>Foxp2</i>   | NM_053242.4    | A3SS | 0.21  | chr6:15376689:15376826:chr6:15377870 15377951:15378088:                                              |
| <i>Foxp2</i>   | NM_053242.4    | A3SS | 0.17  | chr6:15376689:15376826:chr6:15377888 15377951:15378088:                                              |
| <i>Frm4a</i>   | NM_172475.3    | SE   | 0.05  | chr2:4605970:4606066:chr2:4607999:4608070:chr2:4610967:4614043:                                      |
| <i>Frm5</i>    | NM_172673.3    | A3SS | -0.11 | chr2:121548889:121549232:chr2:121547648 121548023:121545529:                                         |
| <i>Gabra1</i>  | NM_010250.5    | RI   | -0.06 | chr11:4218293042182874:chr11:4218238942182166:                                                       |
| <i>Garnl3</i>  |                | A5SS | 0.06  | chr2:33105023:33104849 33104853:chr2:33085875:33085944:                                              |
| <i>Gnptab</i>  | NM_001004164.2 | RI   | -0.11 | chr10:8837922488379314:chr10:8837946988379535:                                                       |
| <i>Gpc6</i>    | NM_011821.3    | SE   | -0.06 | chr14:117888522:117888665:chr14:117892342:117892371:chr14:117951138:117951274:                       |
| <i>Gria3</i>   | NM_016886.4    | SE   | 0.06  | chrX:41654006:41654253:chrX:41654810:41654924:chrX:41669501:41669615:                                |
| <i>Gria3</i>   | NM_016886.4    | SE   | 0.07  | chrX:41654810:41654924:chrX:41669501:41669615:chrX:41672219:41672466:                                |
| <i>Gria3</i>   | NM_016886.4    | SE   | 0.05  | chrX:41654006:41654253:chrX:41654810:41654924:chrX:41672219:41672466:                                |
| <i>Grin1</i>   | NM_008169.3    | A3SS | 0.15  | chr2:25295792:25295937:chr2:25292128 25292484:25291181:                                              |
| <i>Grip1</i>   |                | SE   | 0.24  | chr10:119978438:119978607:chr10:119985474:119986484:chr10:119999752:119999938:                       |
| <i>Grip1</i>   |                | SE   | 0.09  | chr10:119454034:119454422:chr10:119897715:119897795:chr10:119929901:119930036:                       |
| <i>Grip1</i>   | NM_028736.2    | A3SS | 0.13  | chr10:119978438:119978607:chr10:119985474 119986332:119986484:                                       |
| <i>Gstm1</i>   | NM_010358.5    | A3SS | 0.18  | chr3:108016328:108016428:chr3:108015118 108015145:108014945:                                         |
| <i>Hdac9</i>   | NM_024124.3    | A5SS | -0.11 | chr12:34431989:34431863 34431869:chr12:34429498:34429619:                                            |
| <i>Hspa14</i>  | NM_015765.2    | A3SS | 0.28  | chr2:3511015:3511097:chr2:3509020 3509095:3508293:                                                   |
| <i>Htt</i>     | NM_010414.3    | SE   | 0.13  | chr5:34782742:34782825:chr5:34790267:34790387:chr5:34794105:34794164:                                |
| <i>Huwe1</i>   |                | SE   | 0.19  | chrX:151857808:151857913:chrX:151859455:151859688:chrX:151860167:151860268:                          |
| <i>Huwe1</i>   |                | SE   | -0.27 | chrX:151803662:151803802:chrX:151804446:151804540:chrX:151806272:151806407:                          |
| <i>Huwe1</i>   |                | SE   | 0.05  | chrX:151803282:151803569:chrX:151803756:151803802:chrX:151806272:151806407:                          |
| <i>Huwe1</i>   |                | MXE  | -0.08 | chrX:151803282:151803569:chrX:151803756:151803802:chrX:151804446:151804540:chrX:151806272:151806407: |
| <i>Huwe1</i>   |                | A3SS | -0.08 | chrX:151923479:151923561 151923606:chrX:151924662:151924761:                                         |
| <i>Huwe1</i>   |                | A3SS | 0.43  | chrX:151803662:151803802:chrX:151806272 151806276:151806407:                                         |
| <i>Inpp4a</i>  | NM_030266.4    | SE   | 0.17  | chr1:37379922:37380060:chr1:37383339:37383371:chr1:37387698:37387870:                                |
| <i>Inpp4a</i>  | NM_030266.4    | SE   | 0.12  | chr1:37372311:37372419:chr1:37374272:37374289:chr1:37377578:37377761:                                |
| <i>Inpp4a</i>  | NM_030266.4    | SE   | 0.08  | chr1:37372311:37372419:chr1:37374275:37374289:chr1:37377578:37377761:                                |
| <i>Inpp5a</i>  | NM_183144.3    | A5SS | -0.17 | chr7:139578182:139578218 139578269:chr7:139578354:139579652:                                         |
| <i>Kalrn</i>   |                | A5SS | 0.21  | chr16:34256360:34256152 34256191:chr16:34252225:34252399:                                            |
| <i>Kalrn</i>   |                | A3SS | -0.18 | chr16:34227027:34227146:chr16:34220247 34220274:34220056:                                            |
| <i>Kalrn</i>   |                | A3SS | 0.06  | chr16:34016392:34016630:chr16:34014211 34014214:34013958:                                            |
| <i>Kcnc3</i>   |                | SE   | -0.09 | chr7:44598384:44598575:chr7:44600869:44600928:chr7:44601869:44604751:                                |
| <i>Kcnd3</i>   | NM_019931.1    | SE   | 0.05  | chr3:105665457:105665546:chr3:105666962:105667018:chr3:105668080:105668327:                          |
| <i>Kcnma1</i>  | NM_010610.3    | A3SS | -0.28 | chr14:23309040:23309264:chr14:23300042 23300045:23298694:                                            |
| <i>Kcnma1</i>  | NM_010610.3    | A3SS | -0.15 | chr14:23306725:23306753:chr14:23300042 23300045:23298694:                                            |
| <i>Kitl</i>    | NM_013598.2    | SE   | 0.12  | chr10:10007974:100080130:chr10:100080857:100080940:chr10:100087347:100087456:                        |
| <i>Klc2</i>    | NM_008451.2    | A3SS | -0.12 | chr19:5118122:5118408:chr19:5117432 5117469:5117194:                                                 |
| <i>Klc2</i>    | NM_008451.2    | A3SS | 0.08  | chr19:5118184:5118298:chr19:5117432 5117469:5117194:                                                 |
| <i>Lpcat4</i>  | NM_207206.2    | RI   | 0.41  | chr2:1122424761 12242588:chr2:1122427011 12242761:                                                   |
| <i>Lrp8</i>    |                | SE   | -0.21 | chr4:107847444:107847566:chr4:107850104:107850142:chr4:107851308:107851427:                          |
| <i>Lrp8</i>    |                | SE   | -0.07 | chr4:107843216:107843344:chr4:107846239:107846619:chr4:107847444:107847566:                          |
| <i>Lrrtm4</i>  |                | SE   | -0.32 | chr6:80018877:80019186:chr6:80019554:80019706:chr6:80021614:80024932:                                |
| <i>Lrrtm4</i>  |                | A3SS | -0.22 | chr6:80018877:80019186:chr6:80019624 80019643:80019706:                                              |
| <i>Macrod2</i> |                | SE   | -0.08 | chr2:142210100:142210144:chr2:142217578:142217661:chr2:142256521:142256631:                          |
| <i>Macrod2</i> |                | A5SS | 0.2   | chr2:142256521:142256583 142256631:chr2:142261093:142261161:                                         |
| <i>Magi2</i>   | NM_015823.3    | SE   | 0.13  | chr5:20534337:20534526:chr5:20543585:20543626:chr5:20550207:20550298:                                |
| <i>Mdm4</i>    | NM_008575.4    | A3SS | -0.07 | chr1:133018777:133018884:chr1:133012711 133012714:133012637:                                         |
| <i>Mef2c</i>   | NM_025282.3    | SE   | -0.36 | chr13:83592778:83592981:chr13:83625470:83625607:chr13:83633055:83633241:                             |
| <i>Mef2c</i>   | NM_025282.3    | SE   | 0.19  | chr13:83652814:83652986:chr13:83654598:83654621:chr13:83655507:83655636:                             |
| <i>Mef2c</i>   | NM_025282.3    | MXE  | 0.06  | chr13:83592778:83592981:chr13:83625265:83625408:chr13:83625470:83625607:chr13:83633055:83633241:     |
| <i>Mef2c</i>   |                | A3SS | 0.08  | chr13:83656217:83656352:chr13:83662307 83662403:83667079:                                            |
| <i>Meg3</i>    |                | SE   | 0.05  | chr12:109546430:109546542:chr12:109549291:109549371:chr12:109549479:109549552:                       |

|                |                |      |       |                                                                                                      |
|----------------|----------------|------|-------|------------------------------------------------------------------------------------------------------|
| <i>Mettl16</i> | NM_026197.3    | MXE  | 0.13  | chr11:74795982:74796124:chr11:74800326:74800455:chr11:74802893:74803012:chr11:74803831:74803900:     |
| <i>Mfsd11</i>  | NM_178620.3    | RI   | -0.29 | chr11:1168639061:16863946:chr11:1168658911:16865956:                                                 |
| <i>Mfsd11</i>  | NM_178620.3    | A3SS | -0.08 | chr11:116858474:116858581:chr11:116859299 116859324:116859378:                                       |
| <i>Mfsd11</i>  | NM_178620.3    | A3SS | 0.16  | chr11:116858474:116858581:chr11:116859324 116859349:116859378:                                       |
| <i>Mfsd11</i>  | NM_178620.3    | A3SS | -0.13 | chr11:116858474:116858581:chr11:116859299 116859349:116859378:                                       |
| <i>Napb</i>    | NM_019632.3    | RI   | 0.11  | chr2:148709433 148709317:chr2:148707205 148707159:                                                   |
| <i>Napb</i>    | NM_019632.3    | A5SS | 0.21  | chr2:148709433:148707159 148709317:chr2:148706946:148707023:                                         |
| <i>Nell1</i>   |                | SE   | -0.06 | chr7:50701156:50701251:chr7:50826260:50826400:chr7:50848483:50848676:                                |
| <i>Nktr</i>    | NM_010918.2    | SE   | 0.06  | chr9:121731478:121731565:chr9:121738388:121740075:chr9:121741122:121741151:                          |
| <i>Nlgn1</i>   | NM_138666.3    | A5SS | 0.2   | chr3:25440077:25439865 25439892:chr3:25435853:25436642:                                              |
| <i>Nrcam</i>   | NM_176930.4    | SE   | 0.11  | chr12:44566288:44566412:chr12:44566840:44566869:chr12:44568544:44568645:                             |
| <i>Nrcam</i>   | NM_176930.4    | SE   | -0.06 | chr12:44532458:44532659:chr12:44535057:44535074:chr12:44537251:44537356:                             |
| <i>Nrcam</i>   | NM_176930.4    | SE   | 0.15  | chr12:44578145:44578180:chr12:44584835:44584987:chr12:44590108:44590239:                             |
| <i>Nrp2</i>    | NM_010939.3    | SE   | -0.14 | chr1:62786281:62786316:chr1:62812534:62812584:chr1:62815333:62818692:                                |
| <i>Nrp2</i>    | NM_010939.2    | A5SS | 0.06  | chr1:62786281:62786301 62786316:chr1:62795709:62797091:                                              |
| <i>Nrp2</i>    | NM_010939.3    | A5SS | 0.19  | chr1:62786281:62786301 62786316:chr1:62815333:62818692:                                              |
| <i>Nrxn3</i>   | NM_172544.3    | SE   | 0.14  | chr12:89348246:89348449:chr12:89354453:89354479:chr12:89503018:89503137:                             |
| <i>Nrxn3</i>   |                | SE   | 0.06  | chr12:88953390:88953616:chr12:88954811:88954911:chr12:89187022:89187323:                             |
| <i>Nrxn3</i>   |                | A5SS | 0.06  | chr12:90283572:90283650 90283659:chr12:90332109:90334933:                                            |
| <i>Nrxn3</i>   | NM_172544.3    | A5SS | 0.39  | chr12:90283572:90283650 90283659:chr12:903321936:90322641:                                           |
| <i>Nrxn3</i>   |                | A3SS | -0.24 | chr12:90283572:90283650:chr12:90331788 90332109:90334933:                                            |
| <i>P2rx4</i>   | NM_011026.3    | SE   | 0.09  | chr5:122727198:122727291:chr5:122727399:122727464:chr5:122727745:122727840:                          |
| <i>P2rx4</i>   | NM_011026.3    | SE   | -0.07 | chr5:122719130:122719226:chr5:122724594:122724674:chr5:122724990:122725131:                          |
| <i>Pbrm1</i>   |                | SE   | -0.18 | chr14:31054158:31054255:chr14:31056236:31056280:chr14:31061469:31061745:                             |
| <i>Pbrm1</i>   |                | SE   | -0.07 | chr14:31022720:31022859:chr14:31023067:31023170:chr14:31025498:31025650:                             |
| <i>Pbrm1</i>   |                | SE   | 0.05  | chr14:31107109:31107310:chr14:31110415:31110579:chr14:31113849:31114004:                             |
| <i>Pbrm1</i>   |                | SE   | -0.06 | chr14:31019138:31019293:chr14:31022720:31022859:chr14:31023067:31023179:                             |
| <i>Pbrm1</i>   |                | SE   | -0.06 | chr14:31044624:31044709:chr14:31045330:31045425:chr14:31046332:31046423:                             |
| <i>Pbrm1</i>   |                | A5SS | 0.06  | chr14:31023067:31023170 31023179:chr14:31025498:31025650:                                            |
| <i>Pbrm1</i>   |                | A3SS | 0.05  | chr14:31074771:31074982:chr14:31082550 31082553:31082735:                                            |
| <i>Pcdh19</i>  | XM_205287.3    | A3SS | -0.25 | chrX:133632895:133632953:chrX:133625438 133625441:133625269:                                         |
| <i>Pcp2</i>    |                | RI   | -0.09 | chr8:36246323624508:chr8:36235583623377:                                                             |
| <i>Pcsk6</i>   |                | SE   | 0.36  | chr7:66025228:66025407:chr7:66025566:66025604:chr7:66031749:66031851:                                |
| <i>Pde9a</i>   | NM_008804.4    | SE   | 0.09  | chr17:31415280:31415357:chr17:31420245:31420288:chr17:31443166:31443220:                             |
| <i>Pde9a</i>   | NM_008804.4    | SE   | -0.07 | chr17:31420245:31420288:chr17:31443166:31443220:chr17:31443838:31443908:                             |
| <i>Pde9a</i>   | NM_008804.4    | RI   | -0.09 | chr17:3145990131460005:chr17:3146017931460261:                                                       |
| <i>Phactr2</i> |                | MXE  | -0.09 | chr10:13261766:13261924:chr10:13257577:13257816:chr10:13255310:13255321:chr10:13253342:13253879:     |
| <i>Pkp4</i>    | NM_026361.2    | SE   | -0.1  | chr2:59347924:59348041:chr2:59350494:59350622:chr2:59352262:59352335:                                |
| <i>Pkp4</i>    |                | SE   | 0.06  | chr2:59214678:59214814:chr2:59266388:59266500:chr2:59289218:59289252:                                |
| <i>Pkp4</i>    |                | MXE  | 0.08  | chr2:59214678:59214814:chr2:59266388:59266500:chr2:59289218:59289252:chr2:59305066:59305197:         |
| <i>Pkp4</i>    | NM_026361.2    | A3SS | -0.06 | chr2:59305305:59305492:chr2:59308008 59308085:59308557:                                              |
| <i>Pkp4</i>    | NM_026361.2    | A3SS | 0.06  | chr2:59310102:59310290:chr2:59311694 59311697:59311913:                                              |
| <i>Plcb1</i>   | NM_019677.2    | SE   | -0.07 | chr2:135387798:135387884:chr2:135399249:135399366:chr2:135472053:135475258:                          |
| <i>Polrmt</i>  | NM_172551.3    | RI   | -0.11 | chr10:7973750979737457:chr10:7973736279737264:                                                       |
| <i>Ppp1r1b</i> | NM_144828.2    | RI   | -0.11 | chr11:9834999698350110:chr11:9835056998350629:                                                       |
| <i>Ppp4r4</i>  | NM_028980.3    | SE   | -0.1  | chr12:103603972:103604058:chr12:103604577:103604692:chr12:103604967:103605060:                       |
| <i>Ppp4r4</i>  | NM_028980.3    | SE   | -0.07 | chr12:103558368:103558470:chr12:103575709:103575781:chr12:103576281:103576428:                       |
| <i>Prkgg</i>   | NM_011102.4    | SE   | -0.14 | chr7:33145122:3314541:chr7:3318860:3319012:chr7:3319531:3319719:                                     |
| <i>Pthp1</i>   | NM_008956.3    | A3SS | 0.05  | chr10:79854605:79854721:chr10:79856339 79856504:79856534:                                            |
| <i>Rabggb</i>  | NM_011231.2    | A3SS | -0.12 | chr3:153909349:153909459:chr3:153908899 153908915:153908790:                                         |
| <i>Rasa12</i>  |                | A3SS | 0.11  | chr1:157161125:157161326:chr1:157158837 157158858:157158659:                                         |
| <i>Rbfox2</i>  | NM_053104.6    | A3SS | 0.06  | chr15:77099240:77099332:chr15:77098072 77098084:77097940:                                            |
| <i>Rbms3</i>   | NM_178660.4    | MXE  | 0.17  | chr9:116678647:116678697:chr9:116663639:116663647:chr9:116586018:116586095:chr9:116572747:116578702: |
| <i>Rel2</i>    |                | SE   | 0.15  | chr18:37956929:37956994:chr18:37957589:37957774:chr18:37958014:37958389:                             |
| <i>Rel2</i>    |                | SE   | 0.08  | chr18:37955559:37955909:chr18:37956328:37956567:chr18:37956929:37956994:                             |
| <i>Rel2</i>    |                | A5SS | 0.15  | chr18:37955139:37955916 37956567:chr18:37956929:37956994:                                            |
| <i>Rel2</i>    |                | A3SS | -0.37 | chr18:37956929:37956994:chr18:37957459 37957589:37957774:                                            |
| <i>Reln</i>    | NM_011261.2    | A3SS | 0.08  | chr5:21895989:21896087:chr5:21891567 21891697:21891562:                                              |
| <i>Rgs8</i>    | NM_026380.3    | SE   | -0.11 | chr1:153665836:153665916:chr1:153667825:153667953:chr1:153670783:153670884:                          |
| <i>Rims2</i>   |                | SE   | -0.08 | chr15:39511264:39511374:chr15:39517806:39517871:chr15:39534838:39535017:                             |
| <i>Rims2</i>   |                | SE   | 0.1   | chr15:39585590:39585762:chr15:39610064:39610141:chr15:39616269:39616510:                             |
| <i>Rims2</i>   | NM_053271.2    | MXE  | -0.06 | chr15:39436997:39437922:chr15:39452040:39452107:chr15:39452224:39452432:chr15:39454360:39454479:     |
| <i>Scn1a</i>   |                | A5SS | -0.07 | chr2:66324951:66324571 66324655:chr2:66323312:66323444:                                              |
| <i>Shank1</i>  |                | SE   | 0.41  | chr7:44333543:44333618:chr7:44334033:44334059:chr7:44342098:44342180:                                |
| <i>Shank1</i>  |                | SE   | -0.15 | chr7:44343658:44343738:chr7:44344298:44344321:chr7:44344506:44344574:                                |
| <i>Shank1</i>  |                | A3SS | -0.27 | chr7:44342098:44342180:chr7:44342420 44342425:44342544:                                              |
| <i>Slc12a5</i> | NM_020333.2    | SE   | 0.12  | chr2:164996322:164996518:chr2:164996864:164996878:chr2:164997110:164997243:                          |
| <i>Slc6a8</i>  | NM_133987.2    | A5SS | -0.15 | chrX:73679919:73680047 73680071:chrX:73680132:73680234:                                              |
| <i>Slc9a1</i>  | NM_016981.2    | A3SS | -0.29 | chr4:133419454:133419543:chr4:133419925 133419947:133419995:                                         |
| <i>Snap25</i>  | NM_011428.3    | MXE  | -0.08 | chr2:136763573:136763621:chr2:136769743:136769860:chr2:136770057:136770174:chr2:136773895:136774020: |
| <i>Snhg11</i>  | NM_175692.3    | SE   | 0.65  | chr2:158376081:158376326:chr2:158376745:158376824:chr2:158376994:158377072:                          |
| <i>Sox5</i>    | NM_011444.3    | A3SS | -0.13 | chr6:144023169:144023237:chr6:143960917 143960920:143960797:                                         |
| <i>Spock3</i>  | NM_023689.3    | SE   | -0.23 | chr8:62951800:62951988:chr8:63113434:63113442:chr8:63113543:63113588:                                |
| <i>Stam</i>    | NM_011484.2    | SE   | -0.06 | chr2:14074112:14074336:chr2:14102401:14102485:chr2:14115817:14115892:                                |
| <i>Stat3</i>   | XM_011248846.2 | A5SS | 0.05  | chr11:100893286:100893074 100893077:chr11:100898986:100898928:                                       |



|               |               |      |       |                                                                                                  |
|---------------|---------------|------|-------|--------------------------------------------------------------------------------------------------|
| <i>Sugp2</i>  |               | A5SS | -0.06 | chr8:70260469:70260589 70261317:chr8:70262871:70263105:                                          |
| <i>Svil</i>   | NM_153153.3   | SE   | 0.1   | chr18:5059230:5059369:chr18:5060515:5060610:chr18:5062162:5062405:                               |
| <i>Svil</i>   |               | SE   | 0.28  | chr18:5037108:5037165:chr18:5040148:5040239:chr18:5046589:5046646:                               |
| <i>Svil</i>   | NM_153153.3   | SE   | 0.26  | chr18:5055980:5056849:chr18:5057275:5057439:chr18:5058125:5058159:                               |
| <i>Svil</i>   |               | SE   | -0.06 | chr18:4920540:4920874:chr18:4971090:4971197:chr18:5037108:5037165:                               |
| <i>Syn1</i>   | NM_013680.4   | A3SS | 0.19  | chrX:20862499:20863090:chrX:20861571 20861609:20860511:                                          |
| <i>Tbp</i>    | NM_013684.3   | SE   | 0.1   | chr17:15513530:15513621:chr17:15514230:15514397:chr17:15515616:15515710:                         |
| <i>Tbp</i>    | NM_013684.3   | SE   | -0.3  | chr17:15499888:15500024:chr17:15501154:15501202:chr17:15502962:15503128:                         |
| <i>Tbp</i>    | NM_013684.3   | SE   | -0.08 | chr17:15499888:15500024:chr17:15501154:15501202:chr17:15502965:15503128:                         |
| <i>Tbp</i>    | NM_013684.3   | SE   | -0.17 | chr17:15499888:15500024:chr17:15501154:15501202:chr17:15501312:15501357:                         |
| <i>Tbp</i>    | NM_013684.3   | SE   | 0.07  | chr17:15501154:15501202:chr17:15501312:15501357:chr17:15502965:15503128:                         |
| <i>Tbp</i>    | NM_013684.3   | MXE  | -0.09 | chr17:15499888:15500024:chr17:15501154:15501202:chr17:15501312:15501357:chr17:15502965:15503128: |
| <i>Tbp</i>    | NM_013684.3   | A5SS | 0.08  | chr17:15501154:15501202 15501357:chr17:15502965:15503128:                                        |
| <i>Tbp</i>    | NM_013684.3   | A3SS | 0.06  | chr17:15501154:15501202:chr17:15502962 15502965:15503128:                                        |
| <i>Tenn2</i>  |               | A5SS | -0.22 | chr11:36139761:36139549 36139576:chr11:36106719:36106865:                                        |
| <i>Tenn2</i>  |               | A3SS | 0.05  | chr11:36141483:36141683:chr11:36139758 36139761:36139576:                                        |
| <i>Tenn4</i>  |               | SE   | 0.6   | chr7:96553478:96553747:chr7:96643999:96644208:chr7:96694770:96695025:                            |
| <i>Tenn4</i>  | NM_011858.4   | SE   | 0.28  | chr7:96852333:96852582:chr7:96854717:96854737:chr7:96863450:96863682:                            |
| <i>Tenn4</i>  |               | SE   | -0.17 | chr7:96436760:96436858:chr7:96496244:96496340:chr7:96550012:96550299:                            |
| <i>Tenn4</i>  | NM_011858.4   | SE   | 0.14  | chr7:96694770:96695025:chr7:96702642:96702740:chr7:96703926:96704161:                            |
| <i>Trim9</i>  |               | A5SS | -0.1  | chr12:70251260:70250957 70251011:chr12:70248265:70248427:                                        |
| <i>Till5</i>  | NM_00181423.2 | SE   | -0.12 | chr12:86020521:86020603:chr12:86024220:86024342:chr12:86053143:86053760:                         |
| <i>Till5</i>  |               | SE   | 0.06  | chr12:86012648:86012862:chr12:86014767:86014859:chr12:86020521:86020603:                         |
| <i>Till5</i>  |               | A3SS | -0.08 | chr12:85933282:85933674:chr12:85939326 85939329:85939510:                                        |
| <i>Unc5d</i>  | NM_153135.3   | A5SS | -0.09 | chr8:28683252:28683103 28683163:chr8:28675275:28675439:                                          |
| <i>Unc5d</i>  | NM_153135.3   | A5SS | -0.27 | chr8:28724406:28724221 28724260:chr8:28719617:28719994:                                          |
| <i>Vps13d</i> |               | A3SS | 0.08  | chr4:145178189:145178379:chr4:145178077 145178095:145178012:                                     |
| <i>Zfand4</i> |               | SE   | -0.12 | chr6:116273573:116273872:chr6:116284740:116284815:chr6:116285854:116285921:                      |

SE:skipping exon

RI: retention intron

MXE: mutually exclusive exons

A5SS: Alternative 5' splice sites

A3SS: Alternative 3' splice sites

**Table S3. DEGs in PC by scRNA-seq analysis (mutant/control)**

| Gene            | P_value  | Avg_log2FC | PC in mutant mouse             | PC in control mouse            |
|-----------------|----------|------------|--------------------------------|--------------------------------|
|                 |          |            | Population of expressing cells | Population of expressing cells |
| <i>Pvalb</i>    | 1.51E-06 | -1.41      | 0.45                           | 0.80                           |
| <i>Meg3</i>     | 2.19E-16 | -1.06      | 1.00                           | 1.00                           |
| <i>Snhg11</i>   | 1.53E-14 | -0.92      | 0.99                           | 1.00                           |
| <i>Fxyd7</i>    | 1.50E-10 | -0.86      | 0.67                           | 0.98                           |
| <i>Scg5</i>     | 2.21E-15 | -0.82      | 0.69                           | 0.98                           |
| <i>Prkcg</i>    | 3.40E-07 | -0.82      | 0.87                           | 0.96                           |
| <i>Epha4</i>    | 0.000310 | -0.81      | 0.75                           | 0.91                           |
| <i>Epha7</i>    | 0.000816 | -0.78      | 0.55                           | 0.78                           |
| <i>Chgb</i>     | 7.83E-11 | -0.75      | 0.87                           | 1.00                           |
| <i>C1qtnf4</i>  | 1.72E-10 | -0.73      | 0.96                           | 1.00                           |
| <i>Cacna2d2</i> | 1.28E-09 | -0.72      | 0.99                           | 1.00                           |
| <i>Map1a</i>    | 2.06E-10 | -0.72      | 0.87                           | 1.00                           |
| <i>Atp2b2</i>   | 8.12E-09 | -0.71      | 1.00                           | 1.00                           |
| <i>Lars2</i>    | 5.65E-10 | -0.71      | 0.66                           | 0.95                           |
| <i>Gad2</i>     | 5.86E-07 | -0.71      | 0.72                           | 0.93                           |
| <i>Kcnc3</i>    | 1.10E-06 | -0.71      | 0.97                           | 1.00                           |
| <i>Oxct1</i>    | 5.70E-12 | -0.70      | 1.00                           | 1.00                           |
| <i>Nav1</i>     | 1.59E-13 | -0.68      | 1.00                           | 1.00                           |
| <i>Car8</i>     | 9.27E-15 | -0.66      | 1.00                           | 1.00                           |
| <i>Washc2</i>   | 1.54E-05 | -0.64      | 0.84                           | 0.95                           |
| <i>Kcnma1</i>   | 1.05E-06 | -0.64      | 0.97                           | 1.00                           |
| <i>Eif2s3y</i>  | 3.96E-11 | -0.64      | 0.31                           | 0.84                           |
| <i>Shank1</i>   | 1.25E-10 | -0.64      | 0.99                           | 1.00                           |
| <i>Dst</i>      | 5.21E-07 | -0.63      | 0.93                           | 1.00                           |
| <i>Malat1</i>   | 0.000270 | -0.63      | 1.00                           | 1.00                           |
| <i>Synpr</i>    | 3.16E-05 | -0.63      | 0.39                           | 0.67                           |
| <i>Lpgat1</i>   | 5.78E-06 | -0.62      | 0.96                           | 1.00                           |
| <i>Sema7a</i>   | 3.30E-07 | -0.61      | 0.58                           | 0.95                           |
| <i>Plxna4</i>   | 6.27E-09 | -0.60      | 0.55                           | 0.91                           |
| <i>Grm1</i>     | 7.37E-05 | -0.59      | 0.97                           | 0.98                           |
| <i>Kifc2</i>    | 2.59E-10 | -0.59      | 0.61                           | 0.91                           |
| <i>Adcy1</i>    | 1.32E-07 | -0.58      | 1.00                           | 1.00                           |
| <i>Atp1b1</i>   | 1.13E-06 | -0.58      | 1.00                           | 1.00                           |
| <i>Nexn</i>     | 1.02E-08 | -0.58      | 0.93                           | 0.98                           |
| <i>Rgs7bp</i>   | 3.52E-08 | -0.56      | 0.97                           | 1.00                           |
| <i>Cntnap5a</i> | 0.00581  | -0.56      | 0.82                           | 0.86                           |
| <i>Ktn1</i>     | 8.37E-09 | -0.56      | 0.93                           | 1.00                           |
| <i>Ptprr</i>    | 6.32E-06 | -0.56      | 0.82                           | 1.00                           |
| <i>Inpp5a</i>   | 1.24E-06 | -0.55      | 0.99                           | 1.00                           |

|                  |          |       |      |      |
|------------------|----------|-------|------|------|
| <i>Cttnbp2</i>   | 7.51E-07 | -0.55 | 0.87 | 0.96 |
| <i>Ccdc88a</i>   | 6.68E-11 | -0.55 | 1.00 | 1.00 |
| <i>Cacna1g</i>   | 1.58E-06 | -0.55 | 0.81 | 1.00 |
| <i>Syne1</i>     | 7.24E-08 | -0.54 | 0.76 | 0.98 |
| <i>Camk2a</i>    | 8.90E-07 | -0.54 | 0.72 | 0.95 |
| <i>AI593442</i>  | 0.000864 | -0.53 | 0.99 | 1.00 |
| <i>Calr</i>      | 8.54E-07 | -0.52 | 0.97 | 1.00 |
| <i>Atrnl1</i>    | 8.90E-08 | -0.52 | 0.67 | 0.95 |
| <i>Npnt</i>      | 0.00201  | -0.52 | 0.33 | 0.55 |
| <i>Mia3</i>      | 6.70E-06 | -0.52 | 0.85 | 0.95 |
| <i>Cd47</i>      | 2.04E-05 | -0.52 | 0.99 | 1.00 |
| <i>Ndnf</i>      | 0.00806  | -0.52 | 0.87 | 0.95 |
| <i>Hist1h2ap</i> | 0.0151   | -0.52 | 0.30 | 0.58 |
| <i>Atp2a2</i>    | 4.16E-06 | -0.51 | 1.00 | 1.00 |
| <i>Tpr</i>       | 1.22E-07 | -0.51 | 0.96 | 1.00 |
| <i>Arhgef33</i>  | 5.72E-09 | -0.51 | 0.99 | 1.00 |
| <i>Kcna1</i>     | 1.79E-06 | -0.51 | 0.67 | 0.87 |
| <i>Thy1</i>      | 5.58E-06 | -0.51 | 0.97 | 1.00 |
| <i>Itp1</i>      | 0.000551 | -0.51 | 1.00 | 1.00 |
| <i>Rps27a</i>    | 1.55E-05 | 0.50  | 1.00 | 1.00 |
| <i>Sf3b5</i>     | 4.18E-06 | 0.51  | 0.96 | 0.95 |
| <i>Polr2k</i>    | 2.15E-06 | 0.51  | 0.93 | 0.82 |
| <i>Nop10</i>     | 6.65E-06 | 0.52  | 0.99 | 0.96 |
| <i>Cck</i>       | 0.0218   | 0.52  | 0.84 | 0.75 |
| <i>Rpl24</i>     | 1.71E-06 | 0.54  | 0.99 | 1.00 |
| <i>Ccng1</i>     | 1.16E-05 | 0.54  | 0.69 | 0.46 |
| <i>Rbp1</i>      | 0.00289  | 0.54  | 0.66 | 0.42 |
| <i>Rps3a1</i>    | 1.24E-06 | 0.55  | 1.00 | 1.00 |
| <i>Nnat</i>      | 0.0949   | 0.55  | 0.73 | 0.76 |
| <i>Tbca</i>      | 8.67E-09 | 0.55  | 1.00 | 0.98 |
| <i>Bcl2l11</i>   | 0.000314 | 0.55  | 0.78 | 0.60 |
| <i>Rpl3</i>      | 3.15E-07 | 0.56  | 1.00 | 1.00 |
| <i>Scg2</i>      | 0.00360  | 0.56  | 0.79 | 0.69 |
| <i>Tmsb4x</i>    | 5.09E-05 | 0.56  | 1.00 | 1.00 |
| <i>Rps26</i>     | 1.21E-07 | 0.56  | 1.00 | 1.00 |
| <i>Rps28</i>     | 1.03E-07 | 0.56  | 1.00 | 1.00 |
| <i>Atp6v1g1</i>  | 6.58E-07 | 0.57  | 0.97 | 1.00 |
| <i>Gm32913</i>   | 0.0534   | 0.57  | 0.12 | 0.02 |
| <i>Jund</i>      | 2.62E-05 | 0.57  | 1.00 | 0.98 |
| <i>Rpl37a</i>    | 6.73E-08 | 0.58  | 1.00 | 1.00 |
| <i>Lsm7</i>      | 3.89E-10 | 0.58  | 0.99 | 0.95 |
| <i>Rps27l</i>    | 1.70E-06 | 0.59  | 0.96 | 0.95 |

|                      |          |      |      |      |
|----------------------|----------|------|------|------|
| <i>Rps4x</i>         | 1.20E-05 | 0.59 | 0.99 | 1.00 |
| <i>Rpl35</i>         | 3.96E-07 | 0.60 | 0.99 | 1.00 |
| <i>Zbtb20</i>        | 0.00374  | 0.60 | 0.63 | 0.55 |
| <i>Rpl18a</i>        | 8.62E-12 | 0.60 | 1.00 | 1.00 |
| <i>Banf1</i>         | 4.57E-10 | 0.60 | 1.00 | 0.95 |
| <i>Rpl39</i>         | 3.40E-10 | 0.61 | 1.00 | 1.00 |
| <i>Marcks</i>        | 6.70E-05 | 0.61 | 0.99 | 0.98 |
| <i>Serfl</i>         | 9.31E-08 | 0.61 | 0.97 | 0.98 |
| <i>Rpl38</i>         | 3.98E-10 | 0.63 | 1.00 | 1.00 |
| <i>Ptgds</i>         | 0.624    | 0.63 | 0.39 | 0.46 |
| <i>Dbpht2</i>        | 8.02E-05 | 0.63 | 0.91 | 0.82 |
| <i>Rps27</i>         | 1.78E-09 | 0.63 | 1.00 | 1.00 |
| <i>Btg1</i>          | 6.36E-07 | 0.64 | 1.00 | 0.96 |
| <i>Rps15a</i>        | 2.47E-11 | 0.64 | 1.00 | 1.00 |
| <i>Mtpn</i>          | 7.90E-08 | 0.64 | 0.97 | 1.00 |
| <i>Rps29</i>         | 1.68E-09 | 0.64 | 1.00 | 1.00 |
| <i>Slc5a7</i>        | 6.43E-06 | 0.65 | 0.46 | 0.07 |
| <i>Rps5</i>          | 7.90E-10 | 0.66 | 1.00 | 1.00 |
| <i>Taf1d</i>         | 1.08E-07 | 0.66 | 0.99 | 0.96 |
| <i>Snrpd3</i>        | 2.40E-09 | 0.69 | 0.96 | 0.98 |
| <i>Rpl37</i>         | 3.41E-11 | 0.71 | 1.00 | 1.00 |
| <i>Gm10076</i>       | 3.19E-10 | 0.71 | 0.97 | 0.96 |
| <i>Sec61g</i>        | 2.43E-12 | 0.72 | 1.00 | 1.00 |
| <i>Nsa2</i>          | 6.75E-11 | 0.74 | 0.99 | 0.96 |
| <i>1500015O10Rik</i> | 0.00615  | 0.78 | 0.45 | 0.20 |
| <i>Bax</i>           | 9.35E-12 | 0.80 | 0.99 | 0.93 |
| <i>Sat1</i>          | 4.74E-08 | 0.80 | 0.87 | 0.82 |
| <i>Cirbp</i>         | 1.13E-14 | 0.82 | 1.00 | 1.00 |
| <i>Cdkn1a</i>        | 2.03E-05 | 0.89 | 0.63 | 0.33 |

**Table S4. DEGs in PC by snRNA-seq analysis (mutant/control)**

| Gene                 | P_value  | Avg_log2FC | PC in mutant mouse             |                                |
|----------------------|----------|------------|--------------------------------|--------------------------------|
|                      |          |            | Population of expressing cells | Population of expressing cells |
| <i>Paxbp1</i>        | 6.78E-12 | -1.11      | 0.87                           | 1.00                           |
| <i>Hnrnpa2b1</i>     | 2.92E-13 | -0.91      | 0.86                           | 0.99                           |
| <i>Gm26906</i>       | 8.37E-13 | -0.89      | 0.34                           | 0.84                           |
| <i>Dcun1d5</i>       | 9.97E-12 | -0.86      | 0.41                           | 0.88                           |
| <i>Ctnap2</i>        | 0.00503  | -0.82      | 0.62                           | 0.81                           |
| <i>Gm28928</i>       | 0.0311   | -0.81      | 0.16                           | 0.29                           |
| <i>Fras1</i>         | 2.30E-05 | -0.79      | 0.66                           | 0.88                           |
| <i>Acss2</i>         | 1.47E-10 | -0.79      | 0.30                           | 0.75                           |
| <i>Gm40841</i>       | 2.20E-10 | -0.78      | 0.49                           | 0.94                           |
| <i>A230006K03Rik</i> | 5.34E-05 | -0.78      | 0.37                           | 0.64                           |
| <i>Epha7</i>         | 0.000906 | -0.78      | 0.52                           | 0.78                           |
| <i>Srsf2</i>         | 1.62E-10 | -0.73      | 0.41                           | 0.90                           |
| <i>Gm44813</i>       | 9.19E-09 | -0.67      | 0.18                           | 0.61                           |
| <i>Kcnip1</i>        | 5.81E-05 | -0.66      | 0.86                           | 0.99                           |
| <i>Taco1</i>         | 8.16E-08 | -0.65      | 0.11                           | 0.54                           |
| <i>Gm26917</i>       | 0.290    | -0.62      | 0.51                           | 0.69                           |
| <i>Tra2a</i>         | 1.35E-07 | -0.61      | 0.66                           | 0.95                           |
| <i>Lrrtm4</i>        | 0.00130  | -0.60      | 0.80                           | 0.94                           |
| <i>Aff1</i>          | 1.79E-06 | -0.60      | 0.34                           | 0.74                           |
| <i>mt-Nd4l</i>       | 0.00741  | -0.58      | 0.24                           | 0.49                           |
| <i>Myef2</i>         | 3.88E-07 | -0.58      | 0.61                           | 0.91                           |
| <i>Hnrnpdl</i>       | 3.63E-07 | -0.58      | 0.49                           | 0.86                           |
| <i>Hs6st3</i>        | 0.00570  | -0.57      | 0.78                           | 0.93                           |
| <i>Sos1</i>          | 1.34E-05 | -0.57      | 0.86                           | 0.98                           |
| <i>Apip</i>          | 2.93E-09 | -0.57      | 0.21                           | 0.68                           |
| <i>Adarb2</i>        | 0.593    | -0.57      | 0.10                           | 0.12                           |
| <i>Gria2</i>         | 3.17E-10 | -0.56      | 1.00                           | 1.00                           |
| <i>Dpp10</i>         | 3.17E-05 | -0.56      | 1.00                           | 0.99                           |
| <i>Zfp711</i>        | 1.41E-06 | -0.56      | 0.34                           | 0.71                           |
| <i>Phldb2</i>        | 5.40E-05 | -0.56      | 0.24                           | 0.59                           |
| <i>Camk1d</i>        | 1.19E-06 | -0.55      | 0.62                           | 0.92                           |
| <i>Setbp1</i>        | 4.54E-05 | -0.55      | 0.73                           | 0.94                           |
| <i>1110019D14Rik</i> | 0.000308 | -0.54      | 0.38                           | 0.69                           |
| <i>9630028H03Rik</i> | 0.000615 | -0.54      | 0.87                           | 0.97                           |
| <i>Cdh13</i>         | 3.46E-05 | -0.54      | 0.51                           | 0.84                           |
| <i>Epha4</i>         | 0.00240  | -0.54      | 0.48                           | 0.71                           |
| <i>Ttc14</i>         | 6.69E-07 | -0.54      | 0.70                           | 0.97                           |
| <i>Ppib</i>          | 3.72E-07 | -0.54      | 0.30                           | 0.74                           |
| <i>Polb</i>          | 6.65E-06 | -0.54      | 0.80                           | 0.98                           |

|                      |          |       |      |      |
|----------------------|----------|-------|------|------|
| <i>Kcna1</i>         | 7.00E-06 | -0.53 | 0.44 | 0.76 |
| <i>Akap7</i>         | 4.37E-06 | -0.53 | 0.37 | 0.75 |
| <i>4732471J01Rik</i> | 3.46E-06 | -0.53 | 0.48 | 0.85 |
| <i>Lhfpl3</i>        | 0.000620 | -0.53 | 0.82 | 0.94 |
| <i>Csmd1</i>         | 0.326    | -0.53 | 0.54 | 0.57 |
| <i>Ddx3y</i>         | 1.84E-11 | -0.53 | 0.00 | 0.43 |
| <i>Large1</i>        | 3.36E-05 | -0.52 | 0.93 | 1.00 |
| <i>Olfm3</i>         | 2.82E-06 | -0.52 | 0.04 | 0.29 |
| <i>Rbm25</i>         | 3.91E-07 | -0.52 | 0.80 | 0.99 |
| <i>Cnot10</i>        | 1.21E-06 | -0.52 | 0.32 | 0.76 |
| <i>Cdc42bpa</i>      | 4.46E-08 | -0.52 | 0.97 | 1.00 |
| <i>Pak1</i>          | 0.000253 | -0.52 | 0.39 | 0.71 |
| <i>Prpf39</i>        | 1.31E-07 | -0.52 | 0.48 | 0.94 |
| <i>Zfp57</i>         | 1.60E-05 | -0.52 | 0.37 | 0.71 |
| <i>Inpp5a</i>        | 5.89E-05 | -0.51 | 0.90 | 0.99 |
| <i>Htr2c</i>         | 0.0100   | -0.51 | 0.14 | 0.31 |
| <i>Arpp21</i>        | 0.000334 | -0.51 | 0.32 | 0.69 |
| <i>Atr</i>           | 8.29E-06 | -0.51 | 0.31 | 0.71 |
| <i>Rab10</i>         | 3.59E-05 | -0.50 | 0.52 | 0.85 |
| <i>Nrxn2</i>         | 0.00162  | 0.50  | 0.78 | 0.76 |
| <i>Zmiz2</i>         | 0.000383 | 0.50  | 0.42 | 0.26 |
| <i>Rpl41</i>         | 0.0258   | 0.50  | 0.63 | 0.60 |
| <i>Ascc2</i>         | 0.00189  | 0.50  | 0.56 | 0.50 |
| <i>Dcc</i>           | 0.494    | 0.50  | 0.41 | 0.54 |
| <i>Ccdc107</i>       | 0.0107   | 0.51  | 0.72 | 0.75 |
| <i>Runx1t1</i>       | 0.0334   | 0.51  | 0.38 | 0.36 |
| <i>Dcx</i>           | 0.000516 | 0.51  | 0.80 | 0.71 |
| <i>1110051M20Rik</i> | 0.000748 | 0.51  | 0.82 | 0.79 |
| <i>Arhgdig</i>       | 0.00112  | 0.51  | 0.47 | 0.33 |
| <i>Lrrc28</i>        | 0.000675 | 0.51  | 0.47 | 0.32 |
| <i>Mcf2l</i>         | 0.00162  | 0.51  | 0.75 | 0.78 |
| <i>Edc4</i>          | 0.000834 | 0.51  | 0.45 | 0.31 |
| <i>Dynl1a</i>        | 0.000381 | 0.51  | 0.55 | 0.38 |
| <i>Nell1os</i>       | 0.0670   | 0.51  | 0.32 | 0.28 |
| <i>Gm10658</i>       | 0.000699 | 0.52  | 0.37 | 0.21 |
| <i>Zfp523</i>        | 0.000180 | 0.52  | 0.54 | 0.35 |
| <i>Cop1</i>          | 0.000534 | 0.52  | 0.69 | 0.62 |
| <i>Sfmbt2</i>        | 0.00259  | 0.52  | 0.56 | 0.53 |
| <i>Tspoap1</i>       | 0.000109 | 0.52  | 0.83 | 0.68 |
| <i>P2ry14</i>        | 0.0197   | 0.53  | 0.69 | 0.66 |
| <i>Epha8</i>         | 0.00256  | 0.53  | 0.47 | 0.37 |
| <i>Snx32</i>         | 0.00604  | 0.53  | 0.80 | 0.81 |

|                      |          |      |      |      |
|----------------------|----------|------|------|------|
| <i>Gm12353</i>       | 0.000826 | 0.53 | 0.99 | 0.97 |
| <i>Clpp</i>          | 0.00387  | 0.53 | 0.44 | 0.37 |
| <i>Cul9</i>          | 0.00147  | 0.53 | 0.62 | 0.54 |
| <i>Fam216a</i>       | 0.00197  | 0.53 | 0.48 | 0.36 |
| <i>Gm48383</i>       | 0.00370  | 0.53 | 0.65 | 0.58 |
| <i>Rps27</i>         | 0.0319   | 0.53 | 0.65 | 0.69 |
| <i>Comtd1</i>        | 0.000707 | 0.54 | 0.51 | 0.39 |
| <i>2610020C07Rik</i> | 0.00446  | 0.54 | 0.66 | 0.63 |
| <i>Nsun5</i>         | 0.00306  | 0.54 | 0.45 | 0.35 |
| <i>Flii</i>          | 0.000365 | 0.54 | 0.63 | 0.42 |
| <i>Tmem145</i>       | 0.000625 | 0.54 | 0.78 | 0.74 |
| <i>Nisch</i>         | 0.00127  | 0.54 | 0.92 | 0.95 |
| <i>Maged1</i>        | 0.000561 | 0.54 | 0.56 | 0.42 |
| <i>Sympk</i>         | 0.00266  | 0.54 | 0.62 | 0.55 |
| <i>Lrp8</i>          | 0.000641 | 0.54 | 0.68 | 0.60 |
| <i>Nkain2</i>        | 0.613    | 0.54 | 0.35 | 0.43 |
| <i>Gm26907</i>       | 0.000423 | 0.54 | 0.30 | 0.10 |
| <i>Idh3g</i>         | 0.000154 | 0.54 | 0.44 | 0.23 |
| <i>Phf12</i>         | 0.00250  | 0.55 | 0.66 | 0.65 |
| <i>mt-Cytb</i>       | 0.0131   | 0.55 | 0.92 | 0.88 |
| <i>Coro1b</i>        | 0.000796 | 0.55 | 0.58 | 0.49 |
| <i>Drg1</i>          | 0.00142  | 0.55 | 0.83 | 0.85 |
| <i>Lrrk1</i>         | 0.000268 | 0.55 | 0.25 | 0.04 |
| <i>Gm20388</i>       | 3.76E-07 | 0.55 | 1.00 | 0.99 |
| <i>Asap2</i>         | 0.00106  | 0.55 | 0.73 | 0.69 |
| <i>Dlgap2</i>        | 0.00188  | 0.55 | 0.80 | 0.79 |
| <i>Agri</i>          | 2.19E-05 | 0.56 | 0.69 | 0.51 |
| <i>Cobl</i>          | 0.134    | 0.56 | 0.23 | 0.18 |
| <i>mt-Nd3</i>        | 0.00463  | 0.56 | 0.58 | 0.46 |
| <i>Neurl4</i>        | 0.00669  | 0.56 | 0.49 | 0.53 |
| <i>Chd5</i>          | 0.000572 | 0.56 | 0.66 | 0.57 |
| <i>Tm9sf4</i>        | 0.000839 | 0.56 | 0.72 | 0.63 |
| <i>Rev1</i>          | 0.00108  | 0.56 | 0.75 | 0.69 |
| <i>Gm16183</i>       | 6.85E-05 | 0.56 | 0.94 | 0.90 |
| <i>Plxna3</i>        | 6.00E-05 | 0.56 | 0.44 | 0.21 |
| <i>Uqcrc1</i>        | 0.000455 | 0.56 | 0.65 | 0.57 |
| <i>Dtx3</i>          | 0.00115  | 0.56 | 0.72 | 0.75 |
| <i>Gm26733</i>       | 2.17E-05 | 0.56 | 0.92 | 0.85 |
| <i>Lypla2</i>        | 1.95E-06 | 0.56 | 0.48 | 0.14 |
| <i>Dcaf15</i>        | 0.00293  | 0.56 | 0.51 | 0.40 |
| <i>Gm48742</i>       | 0.00324  | 0.57 | 0.55 | 0.45 |
| <i>Kcnt2</i>         | 0.225    | 0.57 | 0.41 | 0.46 |

|                      |          |      |      |      |
|----------------------|----------|------|------|------|
| <i>Leng8</i>         | 0.00197  | 0.58 | 0.79 | 0.83 |
| <i>Grip1os2</i>      | 0.00277  | 0.58 | 0.69 | 0.62 |
| <i>Gm45645</i>       | 0.00166  | 0.58 | 0.52 | 0.36 |
| <i>Gnptg</i>         | 0.000600 | 0.58 | 0.66 | 0.60 |
| <i>Usp36</i>         | 9.61E-05 | 0.58 | 0.49 | 0.30 |
| <i>Lrrc45</i>        | 0.000622 | 0.58 | 0.54 | 0.42 |
| <i>Cacna2d2</i>      | 4.82E-05 | 0.59 | 0.99 | 0.98 |
| <i>Abca2</i>         | 4.96E-05 | 0.59 | 0.51 | 0.29 |
| <i>Cadm1</i>         | 0.0529   | 0.59 | 0.56 | 0.58 |
| <i>Rps6kb2</i>       | 0.000676 | 0.59 | 0.76 | 0.72 |
| <i>Slc22a17</i>      | 3.91E-06 | 0.60 | 0.75 | 0.54 |
| <i>Klc2</i>          | 0.000167 | 0.60 | 0.61 | 0.46 |
| <i>Rap1gap</i>       | 7.85E-05 | 0.60 | 0.65 | 0.54 |
| <i>Celf3</i>         | 0.000412 | 0.60 | 0.65 | 0.57 |
| <i>Col4a1</i>        | 0.000487 | 0.60 | 0.66 | 0.50 |
| <i>Klhdc10</i>       | 7.89E-05 | 0.60 | 0.89 | 0.88 |
| <i>Atxn2l</i>        | 3.82E-05 | 0.60 | 0.83 | 0.80 |
| <i>Tenn2</i>         | 5.02E-05 | 0.61 | 0.97 | 0.92 |
| <i>Gtf2ird1</i>      | 0.000693 | 0.61 | 0.92 | 0.92 |
| <i>Parp1</i>         | 0.00109  | 0.61 | 0.61 | 0.58 |
| <i>Strn4</i>         | 0.000298 | 0.61 | 0.70 | 0.61 |
| <i>Stx1a</i>         | 7.37E-05 | 0.61 | 0.62 | 0.43 |
| <i>Kcnb2</i>         | 4.08E-05 | 0.61 | 0.99 | 0.98 |
| <i>ErbB4</i>         | 0.136    | 0.62 | 0.30 | 0.29 |
| <i>Dlc1</i>          | 0.0372   | 0.62 | 0.18 | 0.14 |
| <i>Tiam1</i>         | 0.00507  | 0.62 | 0.63 | 0.61 |
| <i>Brd2</i>          | 1.03E-05 | 0.63 | 0.45 | 0.19 |
| <i>Gm26904</i>       | 0.000103 | 0.63 | 0.87 | 0.91 |
| <i>I600010M07Rik</i> | 0.0283   | 0.63 | 0.66 | 0.66 |
| <i>Snrpf</i>         | 1.02E-06 | 0.63 | 0.73 | 0.52 |
| <i>Egfm1</i>         | 0.0140   | 0.63 | 0.72 | 0.59 |
| <i>Apba3</i>         | 5.97E-05 | 0.64 | 0.41 | 0.19 |
| <i>Tyh1</i>          | 0.000764 | 0.64 | 0.61 | 0.60 |
| <i>Atp5b</i>         | 2.09E-05 | 0.64 | 0.76 | 0.69 |
| <i>Adamts11</i>      | 0.0968   | 0.64 | 0.54 | 0.47 |
| <i>Leng9</i>         | 2.88E-05 | 0.65 | 0.54 | 0.35 |
| <i>Gm26518</i>       | 0.000156 | 0.65 | 0.78 | 0.72 |
| <i>Rundc3a</i>       | 1.72E-05 | 0.65 | 0.61 | 0.40 |
| <i>Sag</i>           | 7.23E-05 | 0.65 | 0.62 | 0.47 |
| <i>Gm26749</i>       | 1.22E-06 | 0.65 | 0.83 | 0.71 |
| <i>Ggt7</i>          | 4.81E-05 | 0.66 | 0.75 | 0.68 |
| <i>Itgal1</i>        | 3.76E-05 | 0.67 | 0.54 | 0.31 |



|                      |          |      |      |      |
|----------------------|----------|------|------|------|
| <i>Rnpepl1</i>       | 7.21E-06 | 0.67 | 0.61 | 0.41 |
| <i>Pycard</i>        | 5.68E-07 | 0.68 | 0.48 | 0.14 |
| <i>Mapk8ip1</i>      | 0.000191 | 0.68 | 0.69 | 0.60 |
| <i>mt-Co1</i>        | 0.00948  | 0.68 | 0.90 | 0.91 |
| <i>Ssr4</i>          | 3.43E-05 | 0.68 | 0.65 | 0.52 |
| <i>Gm42439</i>       | 1.45E-06 | 0.68 | 1.00 | 0.97 |
| <i>Gm49179</i>       | 8.03E-06 | 0.69 | 0.83 | 0.70 |
| <i>Mpped2</i>        | 0.0389   | 0.69 | 0.42 | 0.34 |
| <i>Car10</i>         | 0.165    | 0.69 | 0.37 | 0.39 |
| <i>Gpc6</i>          | 0.0528   | 0.70 | 0.62 | 0.55 |
| <i>Gm28376</i>       | 0.000681 | 0.70 | 0.85 | 0.79 |
| <i>Syt7</i>          | 9.48E-06 | 0.70 | 0.76 | 0.61 |
| <i>Tecr</i>          | 2.92E-08 | 0.70 | 0.99 | 0.95 |
| <i>Gm14211</i>       | 0.0292   | 0.71 | 0.70 | 0.83 |
| <i>Tmem208</i>       | 1.28E-05 | 0.71 | 0.68 | 0.60 |
| <i>Thoc1</i>         | 5.70E-10 | 0.71 | 0.96 | 0.91 |
| <i>Arglu1</i>        | 1.53E-08 | 0.73 | 1.00 | 0.98 |
| <i>mt-Nd1</i>        | 0.00111  | 0.73 | 0.86 | 0.74 |
| <i>C130071C03Rik</i> | 4.94E-05 | 0.74 | 0.93 | 0.90 |
| <i>Basp1</i>         | 5.77E-07 | 0.75 | 0.90 | 0.88 |
| <i>D830024N08Rik</i> | 2.38E-05 | 0.75 | 0.73 | 0.64 |
| <i>Gm35188</i>       | 5.65E-06 | 0.75 | 1.00 | 0.98 |
| <i>Ssbp4</i>         | 1.91E-06 | 0.75 | 0.66 | 0.41 |
| <i>4930445B16Rik</i> | 0.00208  | 0.75 | 0.79 | 0.74 |
| <i>Gripap1</i>       | 2.67E-07 | 0.75 | 0.75 | 0.56 |
| <i>Ptprs</i>         | 3.35E-08 | 0.76 | 0.99 | 0.98 |
| <i>Till4</i>         | 2.96E-07 | 0.77 | 0.75 | 0.58 |
| <i>Fndc9</i>         | 1.02E-05 | 0.77 | 0.76 | 0.61 |
| <i>Ptprn</i>         | 5.68E-09 | 0.77 | 0.97 | 0.91 |
| <i>Chkb</i>          | 2.80E-05 | 0.78 | 0.51 | 0.34 |
| <i>Epn1</i>          | 7.02E-05 | 0.79 | 0.52 | 0.36 |
| <i>Sycp2</i>         | 8.53E-07 | 0.79 | 0.70 | 0.49 |
| <i>Ckb</i>           | 0.000267 | 0.80 | 0.90 | 0.93 |
| <i>Exoc4</i>         | 0.000174 | 0.80 | 0.87 | 0.97 |
| <i>Slc6a1</i>        | 3.47E-07 | 0.80 | 0.92 | 0.85 |
| <i>Dalrd3</i>        | 7.97E-11 | 0.82 | 1.00 | 0.95 |
| <i>Clstn2</i>        | 0.233    | 0.82 | 0.42 | 0.51 |
| <i>Socs6</i>         | 1.15E-07 | 0.82 | 0.59 | 0.30 |
| <i>Col4a2</i>        | 0.000639 | 0.83 | 0.56 | 0.45 |
| <i>mt-Co2</i>        | 0.000599 | 0.83 | 0.89 | 0.83 |
| <i>Celf5</i>         | 6.99E-07 | 0.84 | 0.72 | 0.51 |
| <i>Gm28375</i>       | 2.00E-06 | 0.84 | 0.72 | 0.57 |

|                |          |      |      |      |
|----------------|----------|------|------|------|
| <i>Plekhn1</i> | 4.16E-09 | 0.86 | 0.79 | 0.54 |
| <i>Ddx5</i>    | 9.59E-08 | 0.86 | 0.92 | 0.86 |
| <i>Dvl3</i>    | 2.18E-07 | 0.88 | 0.85 | 0.75 |
| <i>Gm16105</i> | 8.22E-10 | 0.90 | 0.58 | 0.16 |
| <i>Fabp7</i>   | 0.000441 | 0.91 | 0.58 | 0.42 |
| <i>Sulf1</i>   | 0.00134  | 0.92 | 0.30 | 0.17 |
| <i>Ppp2r3a</i> | 7.76E-09 | 0.95 | 0.92 | 0.83 |
| <i>Cars2</i>   | 9.78E-09 | 0.96 | 0.68 | 0.43 |
| <i>Zbtb20</i>  | 0.000442 | 0.98 | 0.48 | 0.36 |
| <i>Nrbp2</i>   | 4.03E-08 | 0.99 | 0.75 | 0.60 |
| <i>mt-Atp6</i> | 6.45E-05 | 1.00 | 0.93 | 0.89 |
| <i>Cpt1c</i>   | 1.73E-10 | 1.08 | 0.90 | 0.78 |
| <i>Npdc1</i>   | 4.79E-15 | 1.18 | 0.86 | 0.49 |
| <i>Grk2</i>    | 2.11E-11 | 1.24 | 0.63 | 0.17 |
| <i>E4f1</i>    | 7.73E-12 | 1.28 | 0.76 | 0.50 |
| <i>Ano3</i>    | 8.24E-07 | 1.32 | 0.55 | 0.32 |
| <i>Acsf6</i>   | 3.43E-15 | 1.33 | 0.87 | 0.53 |
| <i>Kirrel3</i> | 0.0223   | 1.40 | 0.38 | 0.35 |

**Table S5. DEGs in GC/GCP by scRNA-seq analysis (mutant/control)**

| Gene                 | P_value   | avg_log2FC | GC/GCP in mutant mouse         | GC/GCP in control mouse        |
|----------------------|-----------|------------|--------------------------------|--------------------------------|
|                      |           |            | Population of expressing cells | Population of expressing cells |
| <i>Hist1h2ap</i>     | 2.36E-193 | -1.15      | 0.46                           | 0.68                           |
| <i>Hist1h4d</i>      | 8.36E-189 | -0.80      | 0.39                           | 0.55                           |
| <i>Mki67</i>         | 1.77E-205 | -0.79      | 0.49                           | 0.68                           |
| <i>Hist1h1b</i>      | 9.24E-121 | -0.73      | 0.48                           | 0.66                           |
| <i>Smc4</i>          | 6.11E-236 | -0.71      | 0.50                           | 0.68                           |
| <i>Nasp</i>          | 0         | -0.71      | 0.80                           | 0.92                           |
| <i>Hist1h1e</i>      | 1.12E-175 | -0.67      | 0.62                           | 0.76                           |
| <i>Gm42418</i>       | 0         | -0.62      | 1.00                           | 1.00                           |
| <i>Ubc</i>           | 0         | -0.60      | 0.69                           | 0.86                           |
| <i>Rpl36al</i>       | 0         | -0.60      | 0.70                           | 0.88                           |
| <i>Cenpe</i>         | 2.07E-143 | -0.58      | 0.29                           | 0.44                           |
| <i>Cenpf</i>         | 2.10E-101 | -0.58      | 0.45                           | 0.61                           |
| <i>Sfrp1</i>         | 2.88E-273 | -0.58      | 0.64                           | 0.83                           |
| <i>Npm1</i>          | 0         | -0.55      | 0.94                           | 0.98                           |
| <i>Rps6</i>          | 0         | -0.55      | 0.92                           | 0.97                           |
| <i>Tuba1b</i>        | 4.44E-224 | -0.54      | 0.88                           | 0.94                           |
| <i>Prc1</i>          | 3.12E-104 | -0.54      | 0.32                           | 0.46                           |
| <i>Hist1h3c</i>      | 4.56E-158 | -0.53      | 0.21                           | 0.35                           |
| <i>Lmb1</i>          | 1.24E-262 | -0.53      | 0.82                           | 0.92                           |
| <i>Hist1h2an</i>     | 5.02E-315 | -0.53      | 0.13                           | 0.33                           |
| <i>Tpr</i>           | 0         | -0.53      | 0.75                           | 0.90                           |
| <i>Cend1</i>         | 4.25E-160 | -0.53      | 0.47                           | 0.66                           |
| <i>Mcm3</i>          | 7.72E-212 | -0.51      | 0.35                           | 0.54                           |
| <i>Cct5</i>          | 0         | -0.51      | 0.73                           | 0.89                           |
| <i>1810022K09Rik</i> | 0         | -0.51      | 0.57                           | 0.78                           |
| <i>Smc1a</i>         | 2.57E-322 | -0.51      | 0.70                           | 0.87                           |
| <i>Neurod2</i>       | 1.34E-92  | 0.50       | 0.55                           | 0.45                           |
| <i>Ptprs</i>         | 3.33E-235 | 0.50       | 0.97                           | 0.93                           |
| <i>Camk2n1</i>       | 3.40E-110 | 0.51       | 0.28                           | 0.15                           |
| <i>ApoE</i>          | 4.36E-238 | 0.51       | 0.57                           | 0.34                           |
| <i>Fabp7</i>         | 1.46E-236 | 0.51       | 0.52                           | 0.30                           |
| <i>Jph4</i>          | 4.83E-116 | 0.51       | 0.26                           | 0.12                           |
| <i>Ppp3ca</i>        | 2.32E-131 | 0.51       | 0.93                           | 0.90                           |
| <i>Pcp4</i>          | 8.28E-48  | 0.52       | 0.22                           | 0.16                           |
| <i>Gpm6a</i>         | 2.08E-171 | 0.52       | 0.92                           | 0.88                           |
| <i>Rufy3</i>         | 5.81E-179 | 0.53       | 0.89                           | 0.82                           |
| <i>Snhg9</i>         | 2.40E-271 | 0.53       | 0.60                           | 0.38                           |
| <i>Anks1b</i>        | 2.04E-127 | 0.54       | 0.35                           | 0.20                           |
| <i>Serfl</i>         | 5.19E-289 | 0.54       | 0.92                           | 0.84                           |

|                  |           |      |      |      |
|------------------|-----------|------|------|------|
| <i>Dpysl2</i>    | 6.91E-298 | 0.54 | 0.96 | 0.90 |
| <i>Prkcb</i>     | 8.20E-118 | 0.55 | 0.45 | 0.31 |
| <i>Zic1</i>      | 1.88E-256 | 0.55 | 1.00 | 1.00 |
| <i>Cnr1</i>      | 3.44E-65  | 0.56 | 0.28 | 0.21 |
| <i>Hist3h2ba</i> | 8.02E-173 | 0.57 | 0.73 | 0.59 |
| <i>Dner</i>      | 1.13E-143 | 0.58 | 0.38 | 0.22 |
| <i>Rtn1</i>      | 8.80E-157 | 0.58 | 0.99 | 0.99 |
| <i>Gm26735</i>   | 3.97E-217 | 0.59 | 0.46 | 0.25 |
| <i>Syt1</i>      | 2.31E-87  | 0.59 | 0.44 | 0.35 |
| <i>mt-Nd4l</i>   | 0         | 0.60 | 0.99 | 0.99 |
| <i>Zbtb18</i>    | 2.56E-198 | 0.60 | 0.92 | 0.86 |
| <i>Tmsb4x</i>    | 1.33E-273 | 0.61 | 1.00 | 1.00 |
| <i>Snca</i>      | 3.01E-119 | 0.61 | 0.41 | 0.28 |
| <i>Cbln1</i>     | 4.13E-163 | 0.61 | 0.46 | 0.28 |
| <i>Slc24a5</i>   | 0         | 0.62 | 0.69 | 0.47 |
| <i>Thra</i>      | 2.55E-166 | 0.62 | 0.63 | 0.46 |
| <i>Gng3</i>      | 1.50E-151 | 0.62 | 0.63 | 0.49 |
| <i>Celf4</i>     | 4.37E-119 | 0.63 | 0.57 | 0.44 |
| <i>Btg1</i>      | 0         | 0.64 | 0.92 | 0.82 |
| <i>Nrxn3</i>     | 1.43E-184 | 0.68 | 0.36 | 0.16 |
| <i>Camk2d</i>    | 2.60E-165 | 0.70 | 0.56 | 0.40 |
| <i>Ly6h</i>      | 1.42E-139 | 0.70 | 0.26 | 0.12 |
| <i>Nnat</i>      | 3.34E-53  | 0.71 | 0.87 | 0.86 |
| <i>Meg3</i>      | 1.78E-112 | 0.73 | 0.38 | 0.21 |
| <i>Cirbp</i>     | 0         | 0.74 | 0.96 | 0.87 |
| <i>Nrep</i>      | 3.49E-252 | 0.74 | 0.93 | 0.88 |
| <i>mt-Atp8</i>   | 0         | 0.76 | 0.99 | 0.97 |
| <i>Tsix</i>      | 0         | 0.76 | 0.33 | 0.00 |
| <i>Mapt</i>      | 4.36E-166 | 0.79 | 0.42 | 0.25 |
| <i>Gm10076</i>   | 0         | 0.79 | 0.89 | 0.82 |
| <i>Dcx</i>       | 1.01E-317 | 0.81 | 0.91 | 0.83 |
| <i>Mndal</i>     | 0         | 0.81 | 0.38 | 0.00 |
| <i>Gm2694</i>    | 0         | 0.93 | 0.87 | 0.69 |

Table S6. List of primers, ss-donor oligonucleotides and LNA probe

| Nucleotides                      | Manufacture       | Sequence                                                                                                            |
|----------------------------------|-------------------|---------------------------------------------------------------------------------------------------------------------|
| hSNUPN_EcoRI_Fw                  | Eurofins Genomics | GAATTC GAAGAGTTGAGTCAGGCCCTG                                                                                        |
| hSNUPN_BamHI_Rv                  | Eurofins Genomics | GATGCCTCATGGAGAATTAA GGATCC                                                                                         |
| R55W crRNA                       | FASMAC            | UUUCUCUUCAGCAAGCGGU                                                                                                 |
| R55W ss-oligo                    | Eurofins Genomics | TCCCCACTCTCCATACCTGTCCAGTCATCTTCAGCCAGTCT<br>TCTGGCATGGTTAACATAATCTAACCACTTCCTGGAAGAG<br>AAAAAGATAGGATCAGGTCTATACAT |
| I312Y* crRNA                     | FASMAC            | GCUCAUAAUCUGUUGGAGC                                                                                                 |
| I312Y* ss-oligo                  | Eurofins Genomics | GCCCACTGACCACCAAGCCAGAATACGCTGGCCCAGCACC<br>AACAGATTTATTGAGCACAAGAGGATCCAGGAAGACACAA<br>AGGAGAAACTCACACACA          |
| R55W Fw                          | Eurofins Genomics | TGCAGAAATCCAAGTGGCTGGATTATGT                                                                                        |
| R55W Rv                          | Eurofins Genomics | ACATAATCCAGCCACTTGGATTTCTGCA                                                                                        |
| I312Y* Fw                        | Eurofins Genomics | TTATGGAGCACAAGAAGAGC                                                                                                |
| I312Y* Rv                        | Eurofins Genomics | ATCTGCTGGAGCTGGTG                                                                                                   |
| LNA probe for<br>U1 SnRNA in ISH | WAKENYAKU         | GG(L)TAT(L)CT5(L)CC5(L)TGC5(L)CAG(L)GTA(L)AGT(L)AT                                                                  |
| Cacna2d2 Fw                      | Eurofins Genomics | GGGTGCCTATAAGGAGTACCAACTAC                                                                                          |
| Cacna2d2 Rv                      | Eurofins Genomics | CTTCAGGAACTCGGTGTTGTTGTC                                                                                            |
| Camk2b Fw                        | Eurofins Genomics | GTTACTCCTGAAGCCAAAAACCTC                                                                                            |
| Camk2b Rv                        | Eurofins Genomics | CCCGTCCACTGGGTTATGGATAAC                                                                                            |
| Ccdc85a Fw                       | Eurofins Genomics | CAACCTTGTCCTATGTTAGGCAGC                                                                                            |
| Ccdc85a Rv                       | Eurofins Genomics | GAGCAATGTACAATCACTCCATGTG                                                                                           |
| Inpp4a Fw                        | Eurofins Genomics | GAGAAAGTGTGGCTGAATGTGGAC                                                                                            |
| Inpp4a Rv                        | Eurofins Genomics | GATACTGCAGGCTGAGGTACGAG                                                                                             |
| Lrg8 Fw                          | Eurofins Genomics | GAGAATGAGTTCAGTGTGGGGAT                                                                                             |
| Lrg8 Rv                          | Eurofins Genomics | GGTCAGTGTATCCATCTCATAGCC                                                                                            |
| Prkcg Fw                         | Eurofins Genomics | ACAAGTTACTGAACCAGGAGGAGG                                                                                            |
| Prkcg Rv                         | Eurofins Genomics | TCTCTACGAGGGTGCAGTCTACAT                                                                                            |
| Rbms3 Fw                         | Eurofins Genomics | ATGCAGCCAACTAACATCGTGG                                                                                              |
| Rbms3 Rv                         | Eurofins Genomics | TTGGACTGTTGGAAGGAGTATGCC                                                                                            |
| Rictor Fw                        | Eurofins Genomics | AGCTACACAAGCTCTAGAGATGCC                                                                                            |
| Rictor Rv                        | Eurofins Genomics | GAACCTCCATATGTAGCACTGGAC                                                                                            |
| Slc12a5 Fw                       | Eurofins Genomics | ACCTGGACCAAGGATAAGTCAGTG                                                                                            |
| Slc12a5 Rv                       | Eurofins Genomics | TATTCACGATGACCTCGTTCAGCC                                                                                            |
| Snhg11 Fw                        | Eurofins Genomics | CTCTTGACACCAAGGATGACGAC                                                                                             |
| Snhg11 Rv                        | Eurofins Genomics | ACTGATGTTGGGGAGTACGTTCT                                                                                             |
| Ttl5 Fw                          | Eurofins Genomics | TTGGCAGCCAGACACTACCTAACT                                                                                            |
| Ttl5 Rv                          | Eurofins Genomics | CCTTGAGTCTCTGGTTCATCTGT                                                                                             |

**Table S7. List of primary antibodies used in the study**

| <b>Antibodies</b>                   | <b>Source</b>       | <b>Identifier</b>  |
|-------------------------------------|---------------------|--------------------|
| Anti-m3G-Cap/m7G-cap                | Merck Millipore     | Cat# MABE419       |
| Anti-Calbindin D28K                 | Santa Cruz          | Cat# sc-7691       |
| Anti-Calbindin D28K                 | Frontier Institute  | Cat# MSFR100400    |
| Alexa fluor 647® Anti-Coilin [1H10] | abcam               | Cat# ab196714      |
| Anti-CRMP2                          | ECM biosciences     | Cat# CP2161        |
| Anti-CRMP2-pT555                    | ECM biosciences     | Cat# CP5391        |
| Anti-NeuroD1                        | abcam               | Cat# ab213725      |
| Anti-Pax2                           | abcam               | Cat# ab79389       |
| Anti-PKC $\gamma$                   | Frontier Institute  | Cat# MSFR104840    |
| Anti-RNUT1 (Snurportin-1)           | Abnova              | Cat# H00010073-B01 |
| Anti-SMN                            | Novus               | Cat# NB100-1936SS  |
| Anti-SNRPD2                         | RayBiotech          | Cat# 144-06983-50  |
| Anti-vGlut2                         | abcam               | Cat# ab79157       |
| Anti-Ki67                           | Thermo (invitrogen) | Cat# 14-5698-82    |
| Anti-Laminin a2                     | ALEXIS              | Cat# 804-190-C100  |
| Anti-GFP                            | Clontech            | Cat# 632592        |

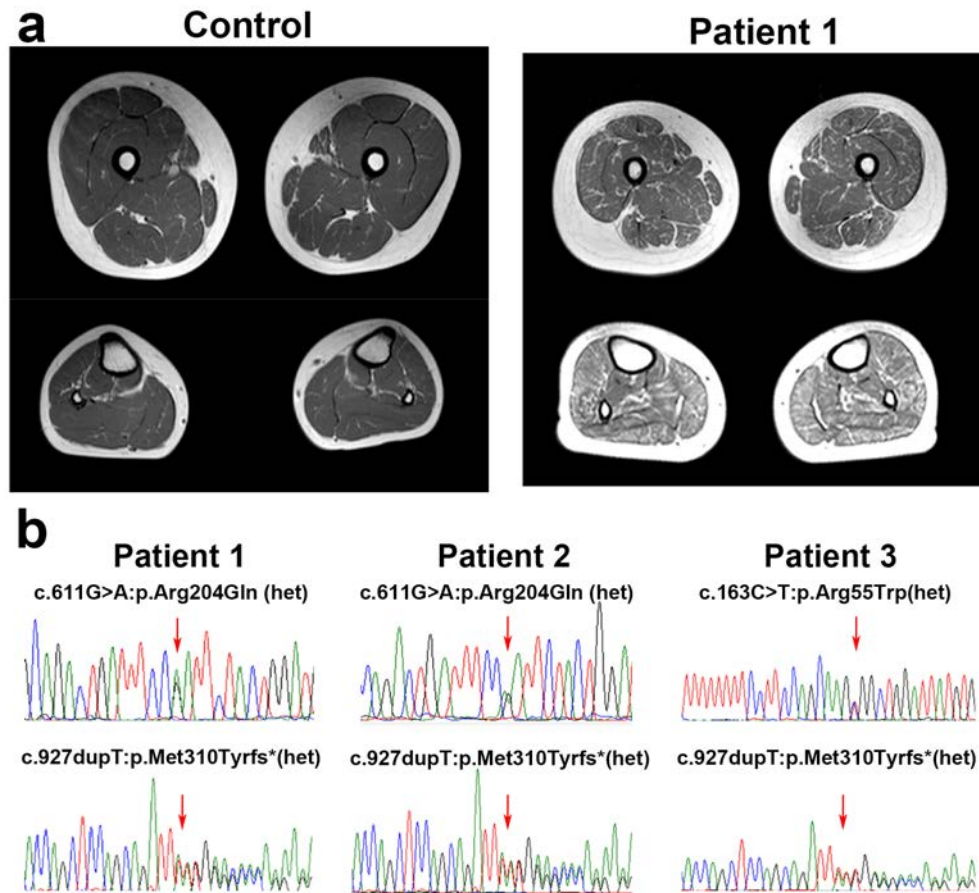

**Supplementary Figure 1. Muscle image and *SNUPN* gene sequence for patients.**

(a) T1W muscle imaging of control and Patient 1 at the age range of 6-10 years-old. For Patient 1, diffuse fatty infiltration is seen in thigh and leg muscles. (b) Compound heterozygous c.611G>A and c.927dupT were identified in Patient 1 and 2, and c.163C>T and c.927dupT in Patient 3 in *SNUPN* gene.

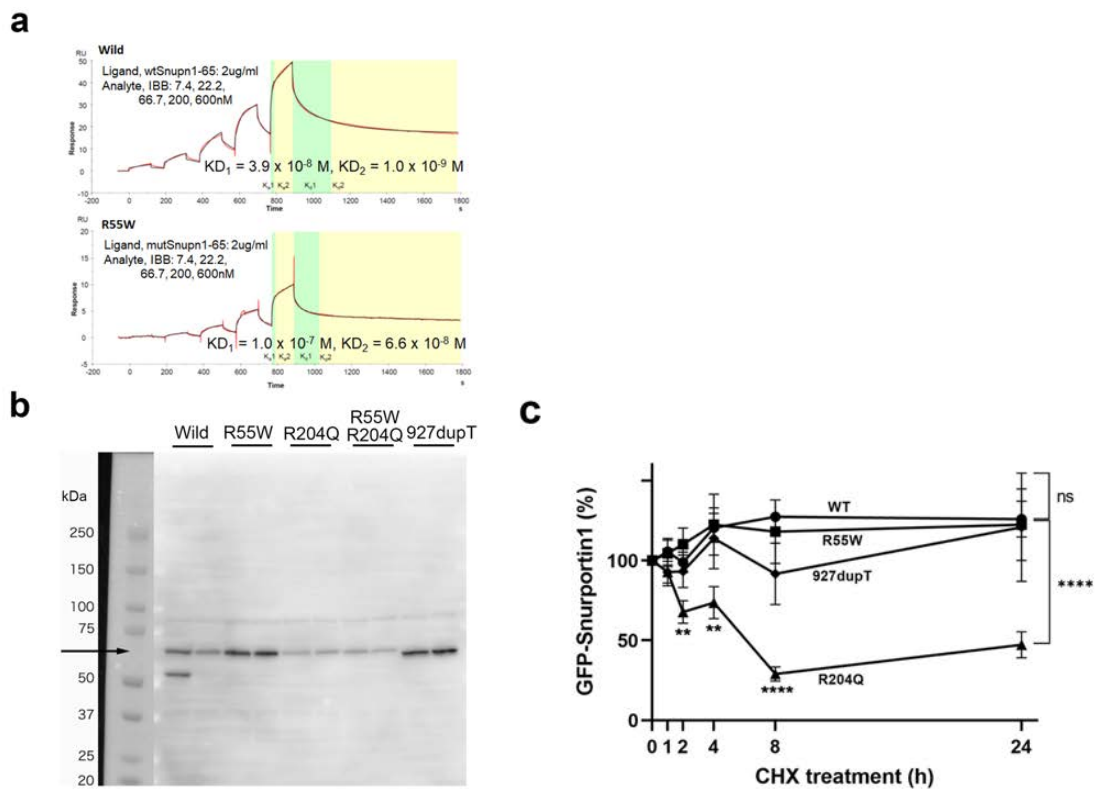

**Supplementary Figure 2. Binding of N-terminal peptides of R55W snurportin-1 to importin beta and the stability of EGFP-snurportin-1 with/without mutations**

(a) Binding of recombinant N-terminal peptides of snurportin-1 and importin beta on BIACORE. Upper, wild type; Lower, R55W. (b) Expression of various EGFP-snurportin-1 proteins in HeLa cells at 24 hours after transfection with CHX treatment (c) Pulse-chase stabilities with CHX treatment of various EGFP-snurportin-1 proteins in HeLa cells after transfection.



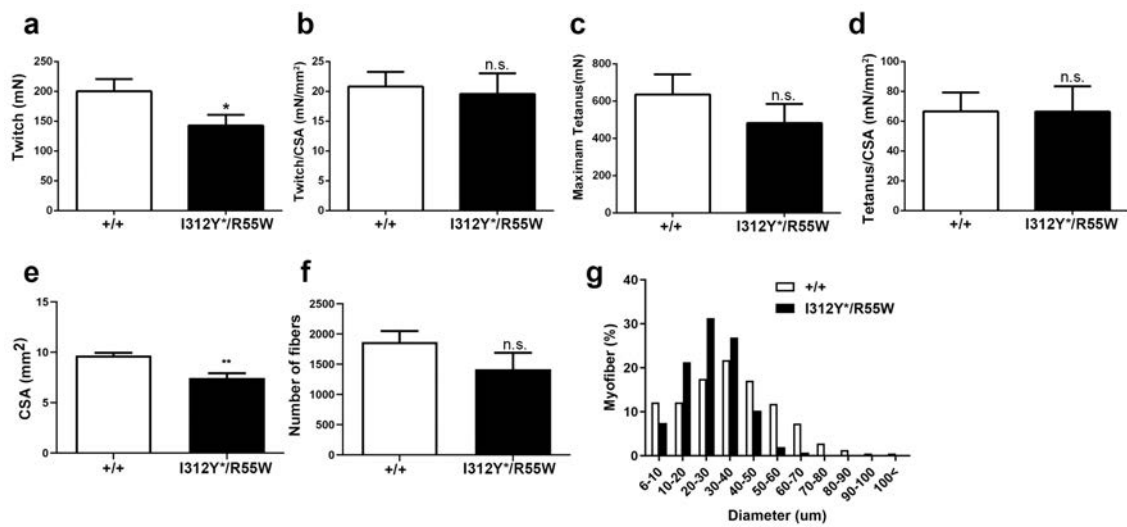

### Supplementary Figure 3. Muscle force and pathology of I312Y\*/R55W

(a, b) Contractile properties of the gastrocnemius muscle, as determined by *ex vivo* measurement of specific isometric force (mN). It was corrected by Cross-Sectional Area (CSA: mm<sup>2</sup>), and specific tetanic force (c, d). (e) The area of tibialis anterior (TA) muscle for wild type and I312Y\*/R55W mice. \*\**p*<0.01 (f) The total number of muscle fibers. (g) The rate of fiber size for wild type and I312Y\*/R55W. (N=3 for each genotype)

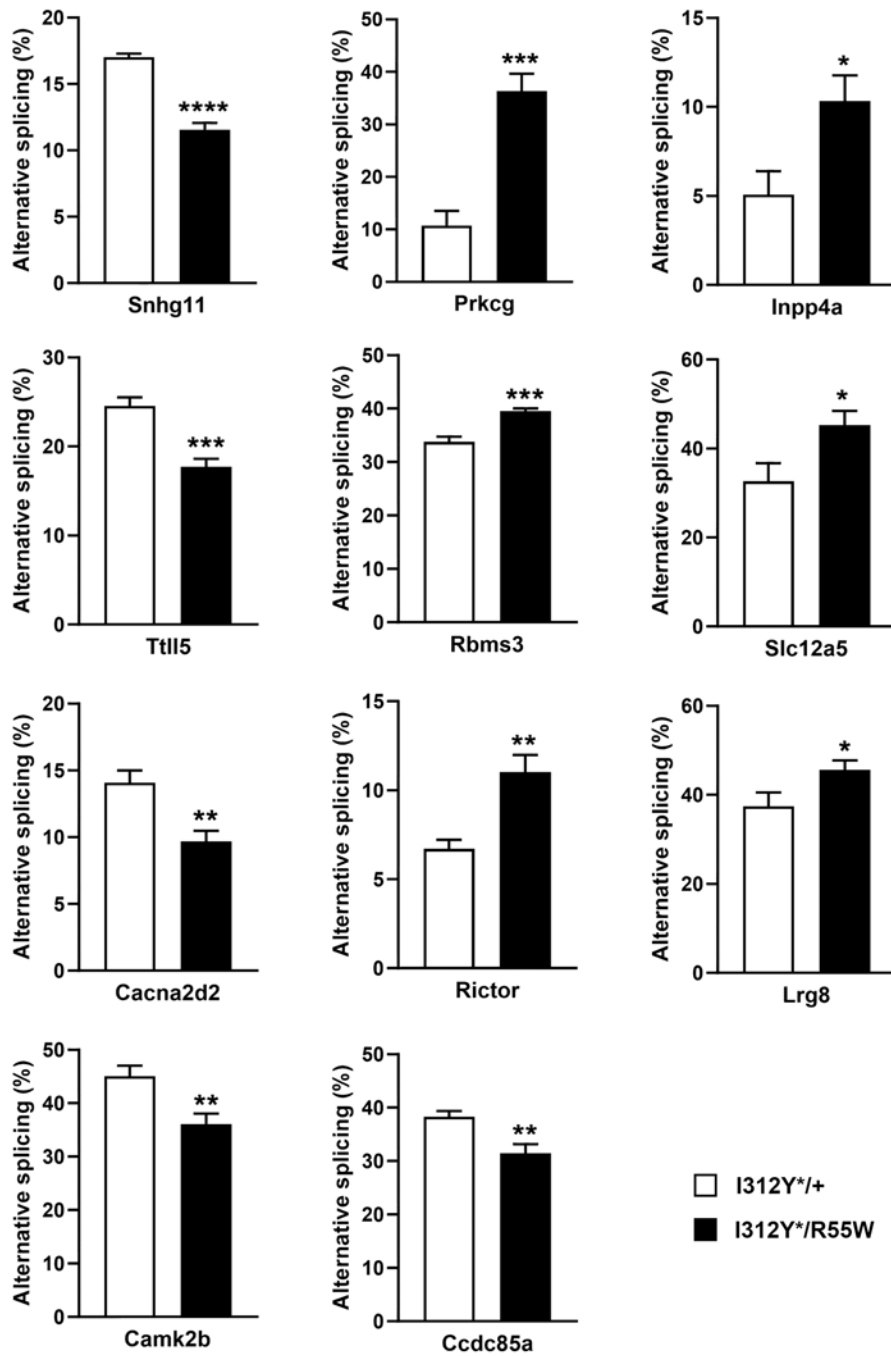

**Supplementary Figure 4. Splicing alteration of the transcripts of 11 PC-specific genes by RT-PCR**

Alternative splicing ratio of each gene between I312Y\*/+ and I312Y\*/R55W was shown.

\*p < 0.05, \*\*p < 0.01, \*\*\*p < 0.001, \*\*\*\*p < 0.0001

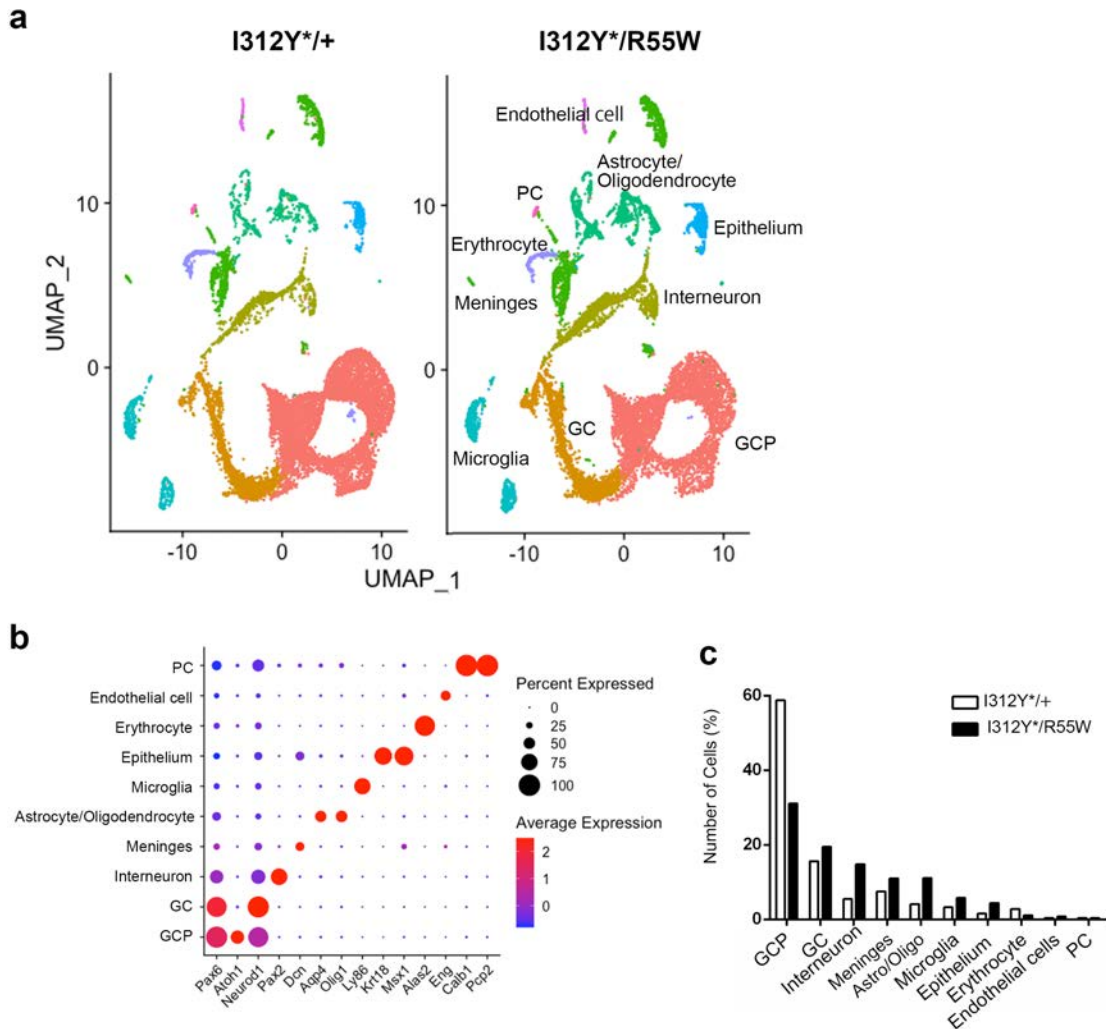

**Supplementary Figure 5. scRNA-seq analysis for whole cerebellum of I312Y\*+/+ and I312Y\*/R55W**

(a) Two-dimensional UMAP distribution of cell clusters of both genotypes. Note the large overlap between control (I312Y\*+/+) and mutant (I312Y\*/R55W). UMAP divided into 10 clusters by R-analysis (resolution=0.05). (b) Identification of cell clusters based on the expression of known genes. (c) Percentage of cell types in the cerebellum of P6 control and mutant mice.

GCP: Granular Cell Progenitor, GC: Granular cell, PC: Purkinje Cell

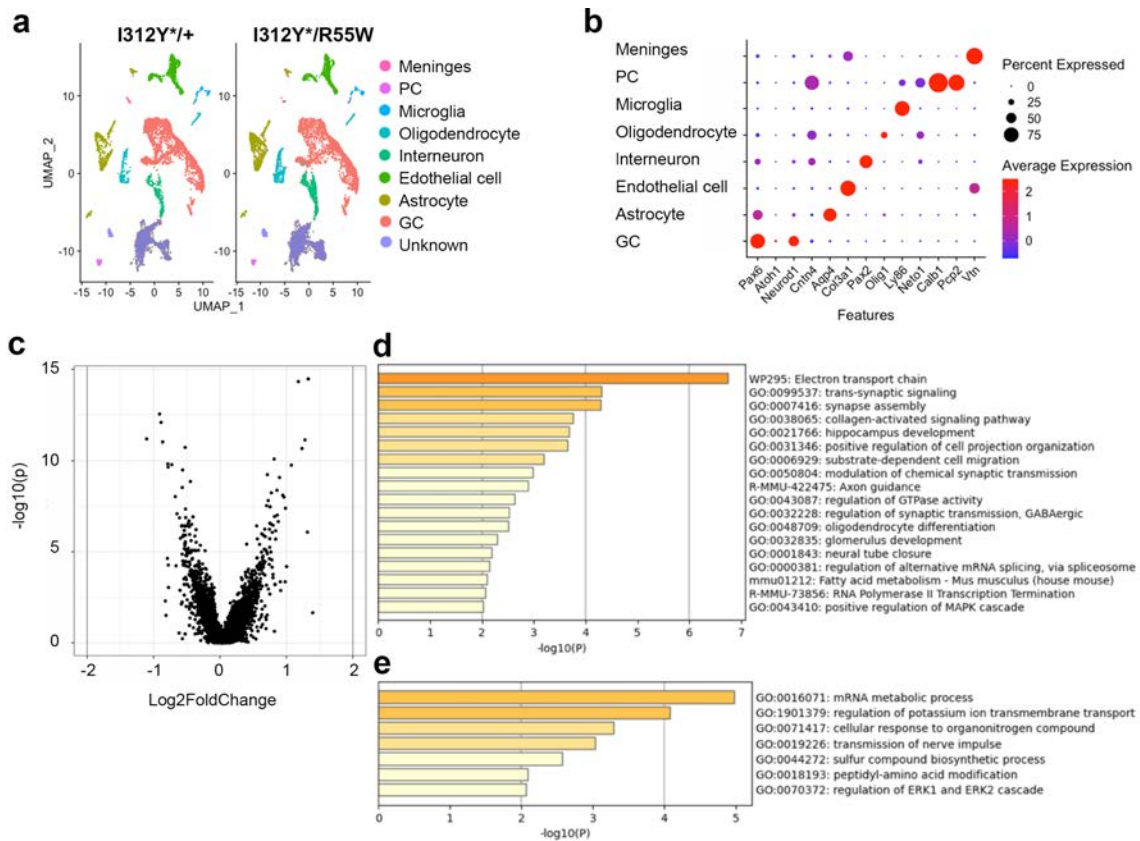

**Supplementary Figure 6. snRNA-seq analysis for whole cerebellum of *I312Y\*+/+* and *I312Y\*/R55W***

(a) Two-dimensional UMAP distribution of snRNA-seq of both genotypes. UMAP divided into 9 clusters by R-analysis (resolution=0.02). (b) Identification of cell clusters based on the expression of known genes. (c) Volcano plot of PC cluster of snRNA-seq. There are 167 up regulated genes and 58 down regulated genes ( $\log$  fold change  $\geq 0.5$  or  $\leq -0.5$ ). Enriched ontology clustered of 167 up regulated genes (d) and 58 down regulated genes (e) by Metascape.

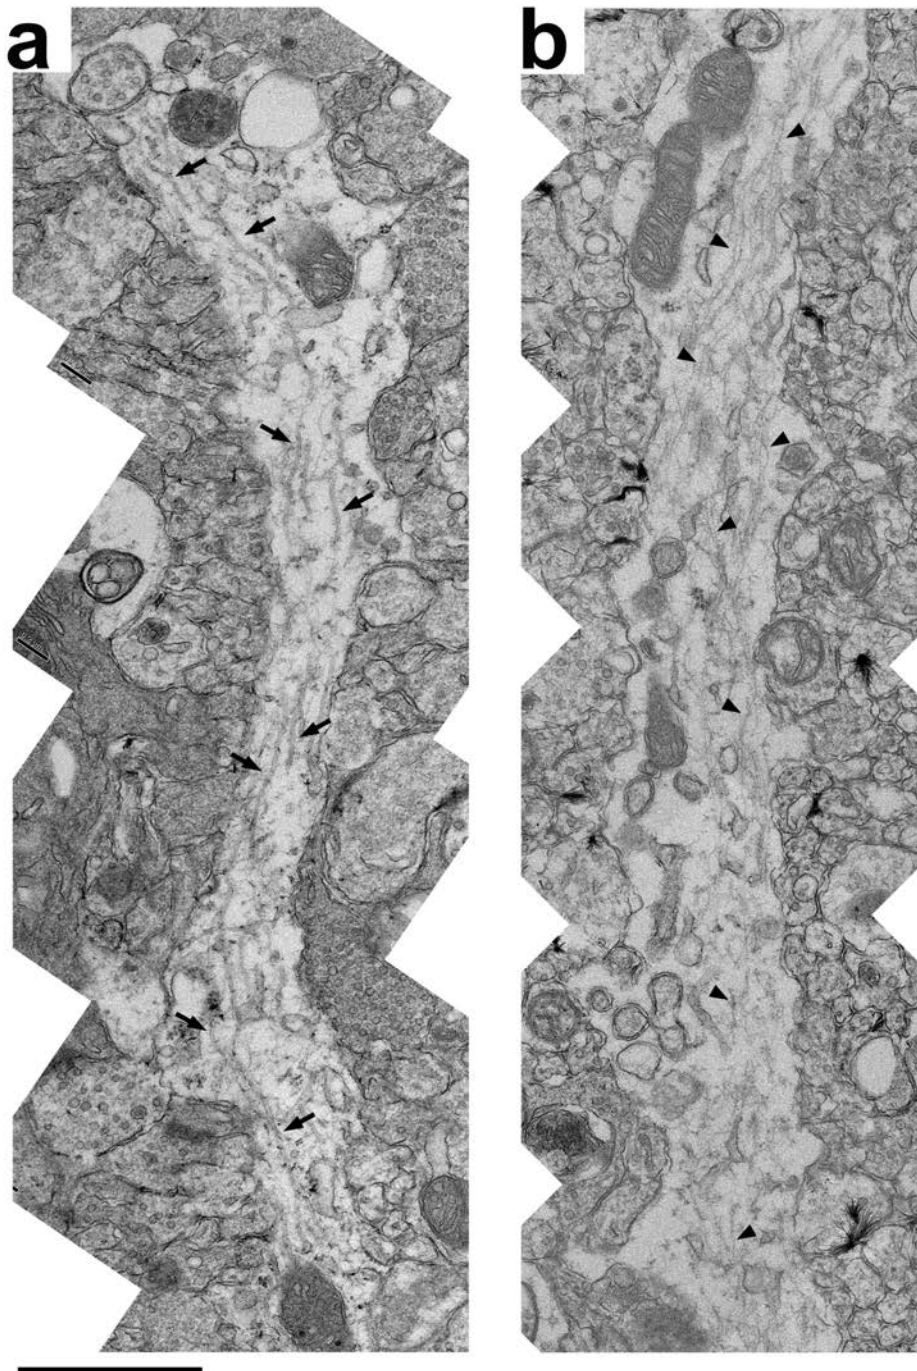

**Supplementary Figure 7. Electron micrographs of proximal dendritic domain in PCs.**

Electron micrographs of proximal dendritic domain in PC of control (I312Y\*/+) (a) and mutant (I312Y\*/R55W) (b) mice at the age of P10. Black arrows and triangles show microtubules. Scale bar, 1  $\mu$  m

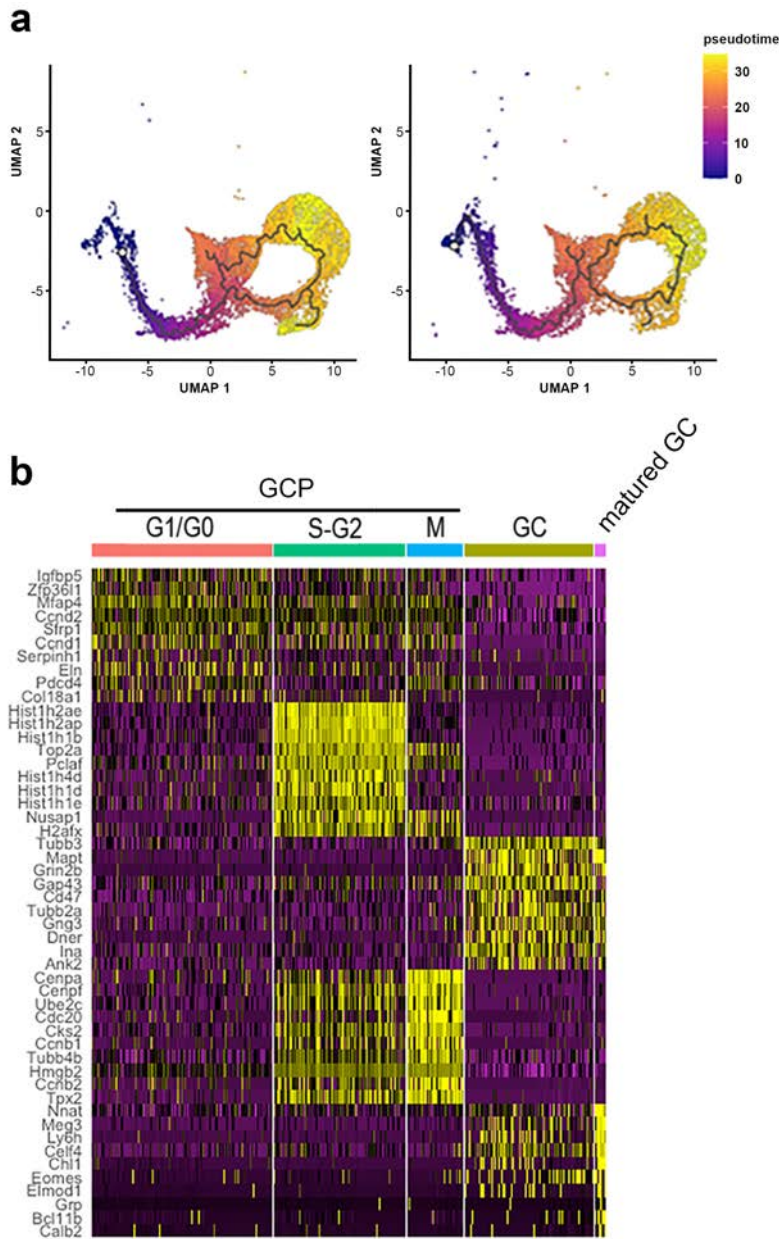

**Supplementary Figure 8. Subcluster analysis for granule cells (GCs) and granule cell progenitors (GCPs)**

(a) Two-dimensional UMAP distribution of cell clusters in the GC by pseudo time for both I312Y<sup>+/+</sup> (left) and I312Y<sup>\*/R55W</sup> (right). (b) Heatmap of specific gene expression in GCs and GCPs grouped by differentiation trajectory (Figure 6c).

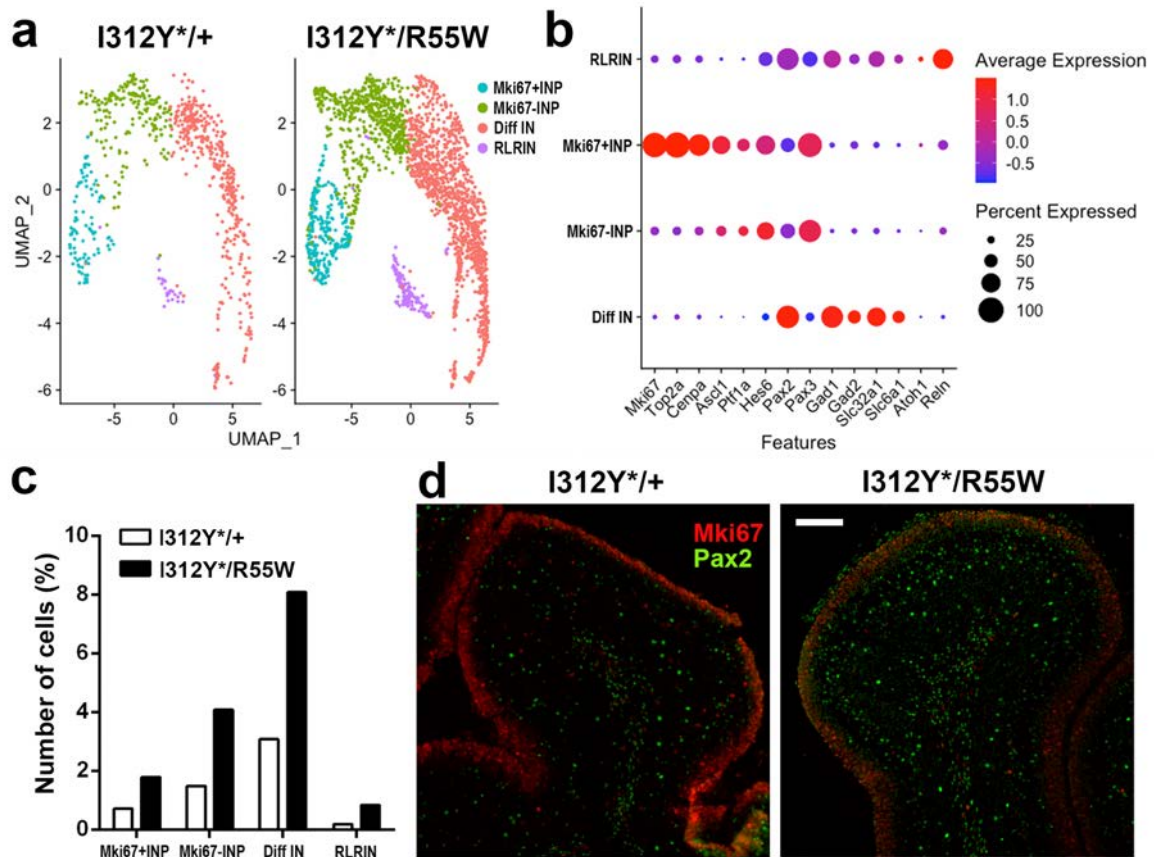

### Supplementary Figure 9. Change of inhibitory interneurons (INs) in cerebella

(a) Two-dimensional UMAP distribution of INs clusters of both genotypes.

UMAP divided into 4 clusters by R-analysis (resolution=0.1). (b) Dotplot showing known genes for proliferation (*Mki67*, *Top2a*, *Cenpa*), differentiation (*Ascl1*, *Ptf1a*, *Hes6*, *Pax2*, *Pax3*, *Gad1*) and maturation (*Gad2*, *Slc32a1*, *Slc6a1*, *Atoh1*, *Reln*).

(c) Percentage of cell number in INs subclusters. (d) Immunostaining for Mki67 and Pax2 for I312Y\*+/+ and I312Y\*/R55W. Pax2 positive INs were increased in molecular layer and white matters on cerebellum section from I312Y\*/R55W. Scale bar, 100  $\mu$ m
